# Supplementary material
Source: Research Square preprint supplement (doi:10.21203/rs.3.rs-9267207/v1)
Supplement: Supplementary file 1 [file 029f66d1021601f87ecfe8fc.doc]

# Supplementary Figures

## Figure S1. Empirical distributions of grain Zn, Fe, and protein

| Brown rice | White rice (milled and polished) |
| --- | --- |
| 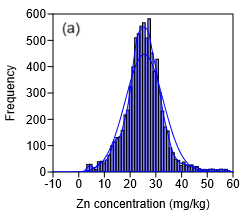 | 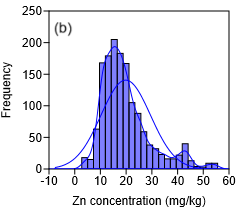 |
| 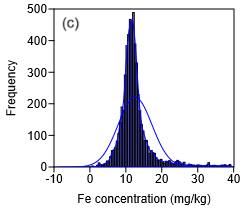 | 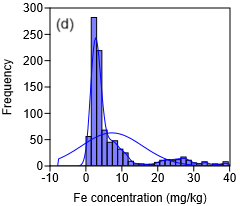 |
| 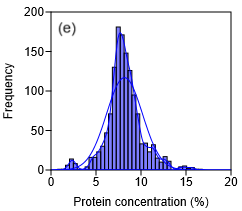 | 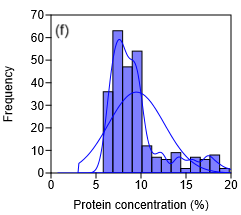 |
| 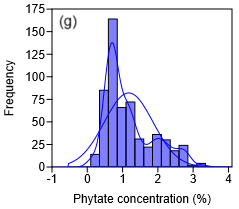 | 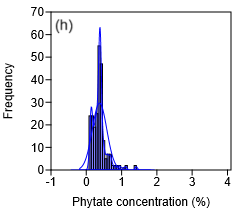 |

Figure S1. Empirical distributions of grain Zn, Fe, protein, and phytate concentrations in brown and white rice.

## Figure S2. Variation with year of release of rice varieties

|  |  |
| --- | --- |
|  |  |

Figure S2. Variations in grain yield (a), grain zinc (b), iron (c), and protein (d) concentrations with the year of release of rice varieties.

## Figure S3. Comparison of different categories of rice

| 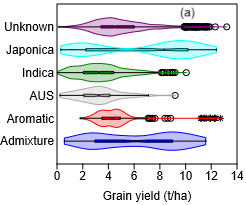 | 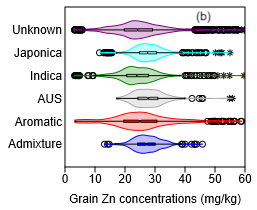 | 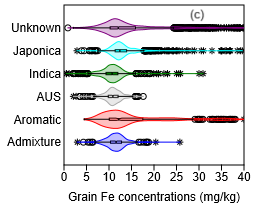 |
| --- | --- | --- |
| 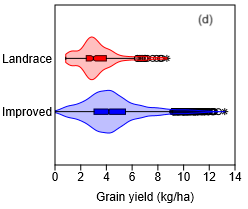 | 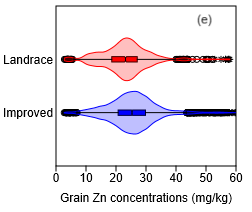 | 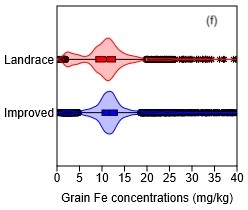 |
| 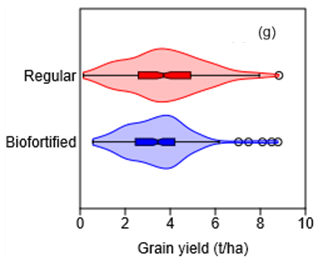 | 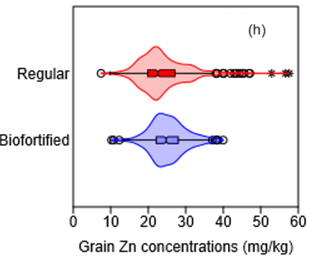 | 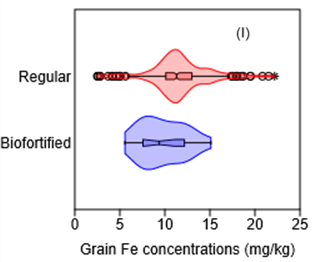 |

Figure S3. Comparison of genotypic differences in terms of grain yield (a, d, g), grain Zn (b, e, h) and Fe (c, f, i) concentrations in brown rice grain.

## Figure S4. PRISMA chart

| 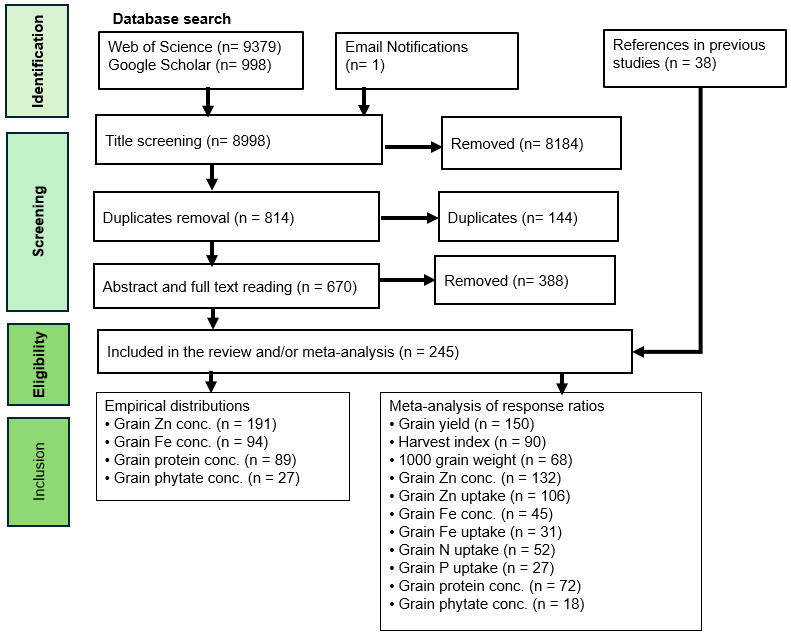 |
| --- |

Figure S4. PRISMA-style flow diagram of the literature search, the number of studies (n) found during the search and the number of studies retained for the review and meta-analysis.

## Figure S5. Map of study sites

| 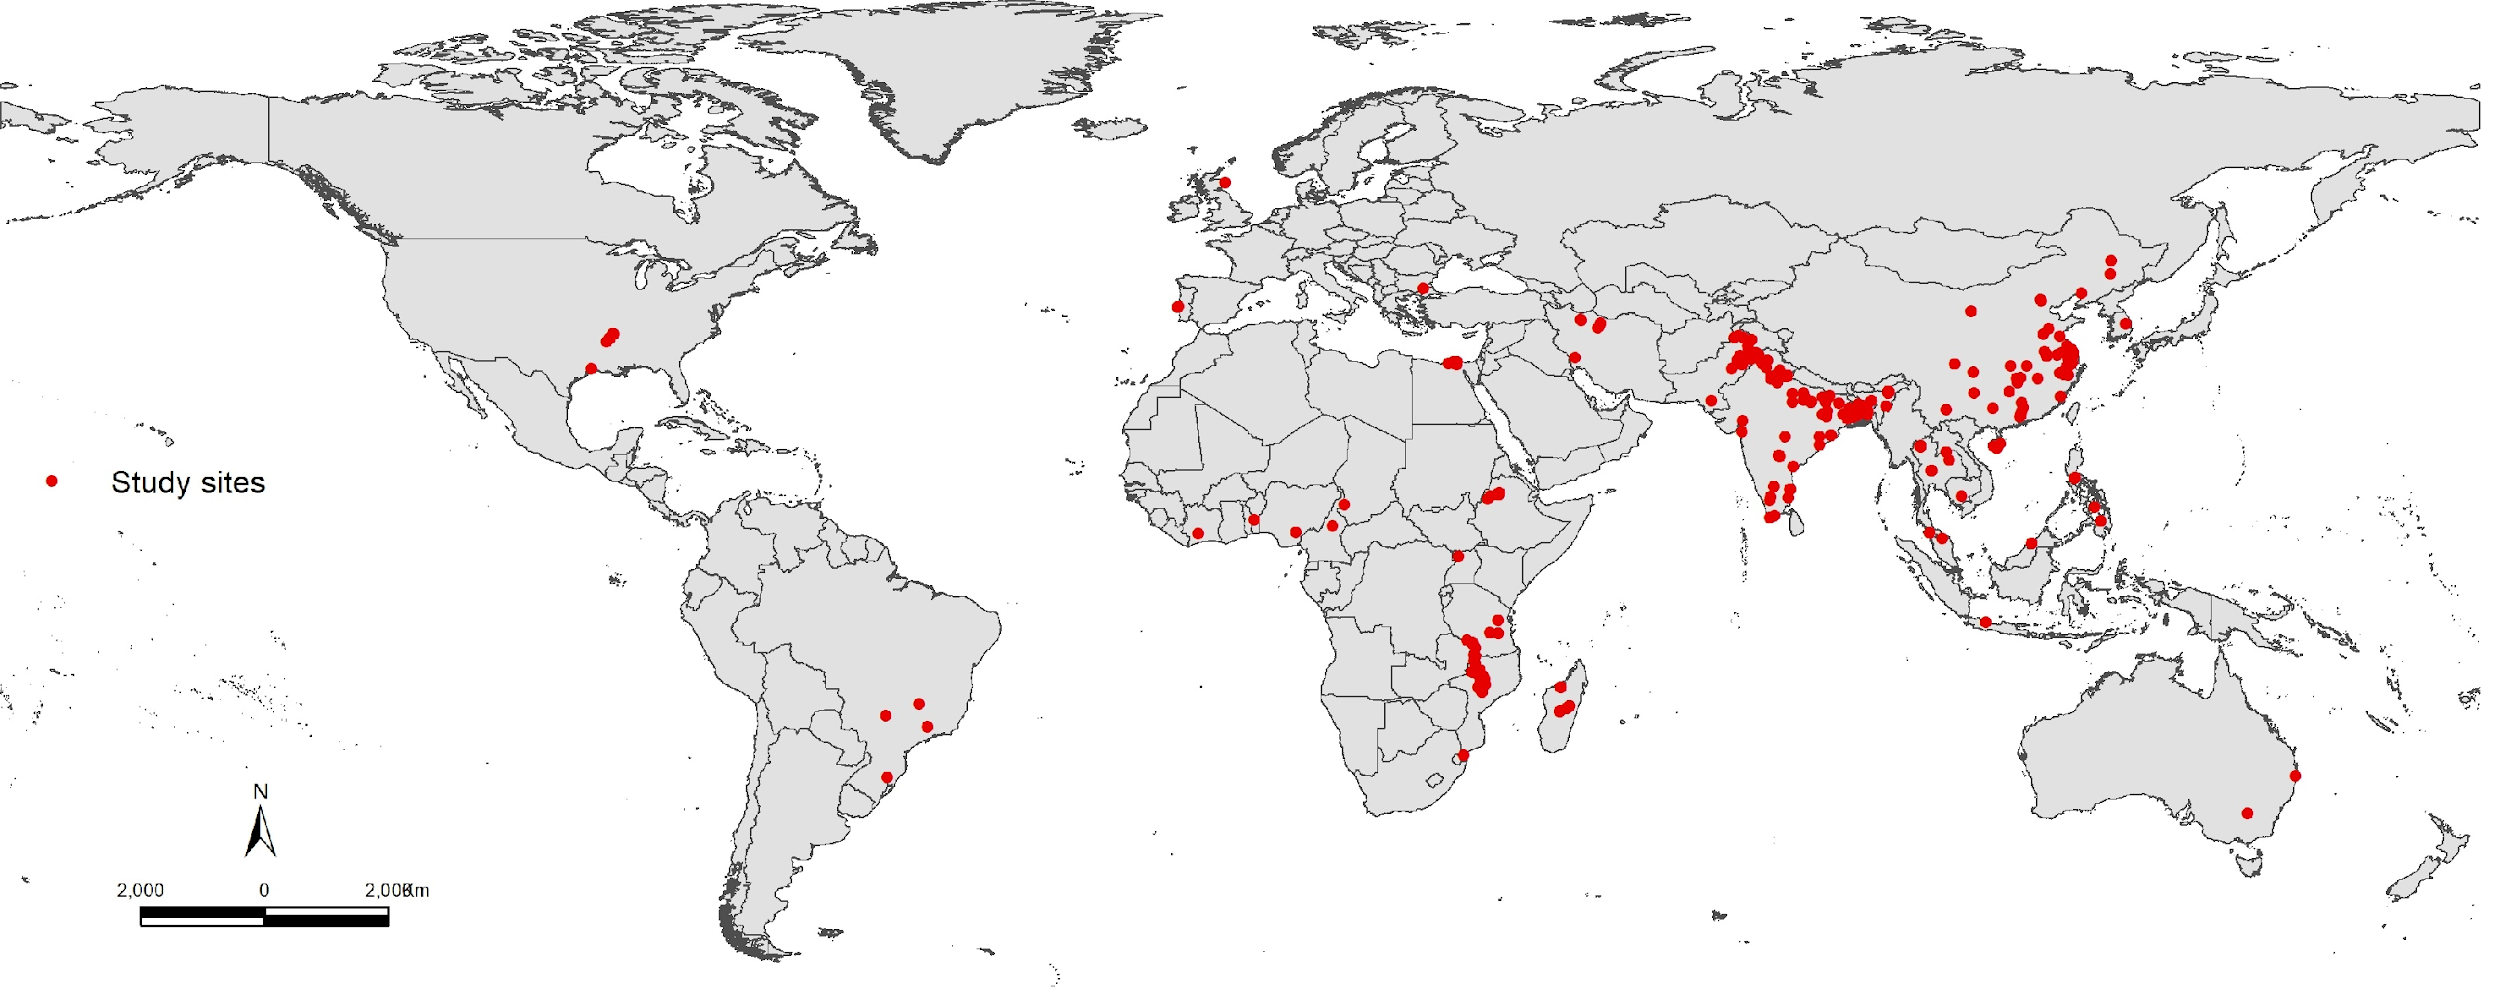 |
| --- |

Figure S5. Maps of the study sites included in this meta-analysis

## Figure S6. Funnel plots and tests of heterogeneity and publication bias

| 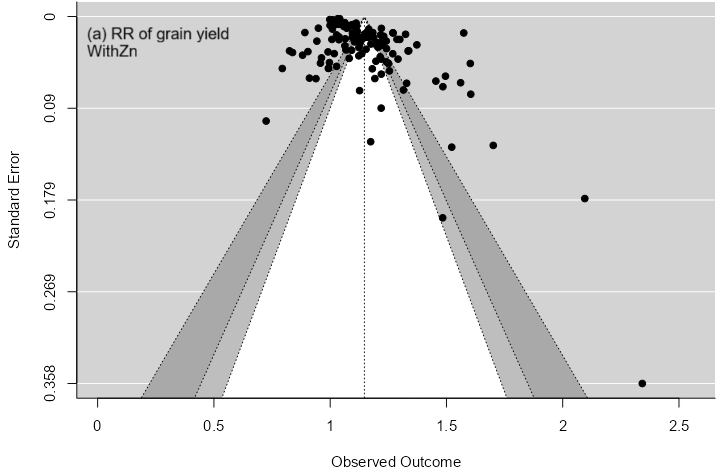 | 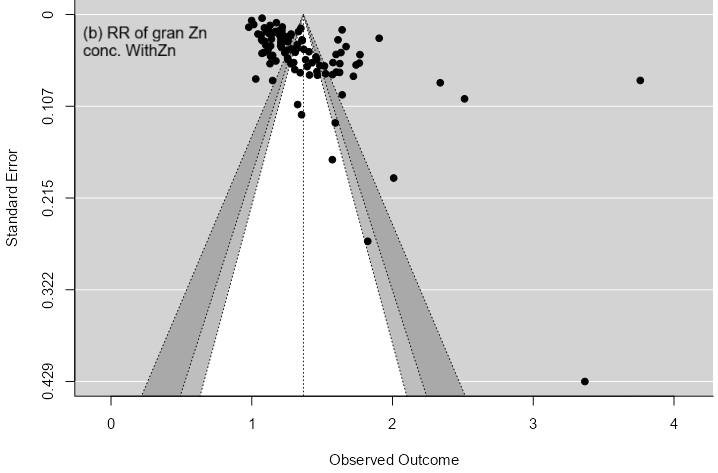 |
| --- | --- |
| 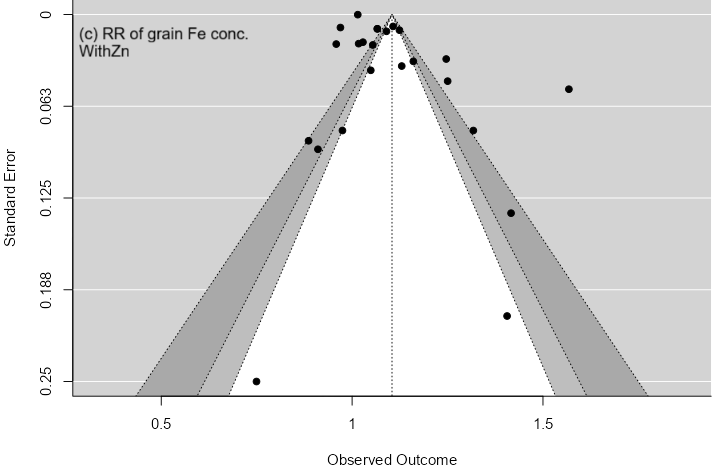 | 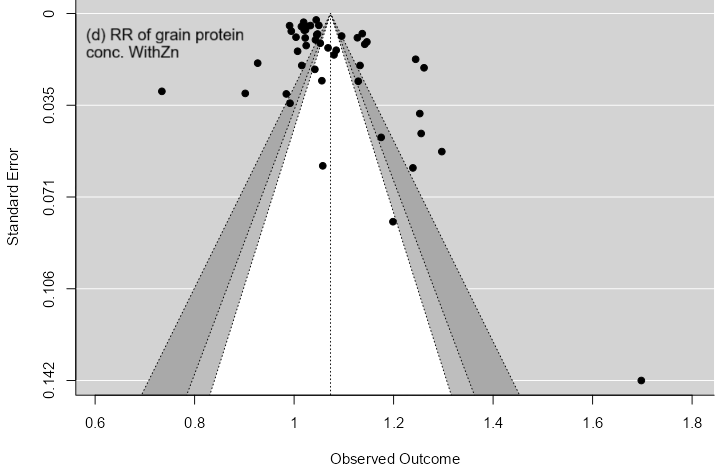 |
| 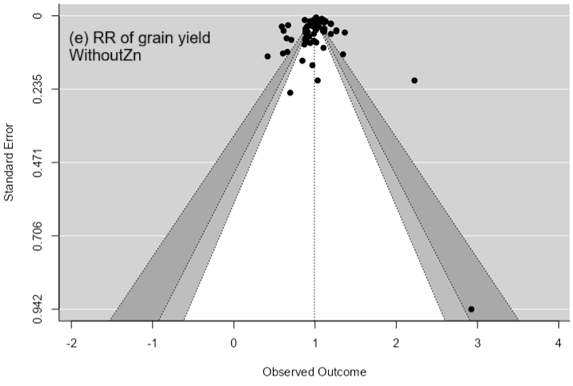 | 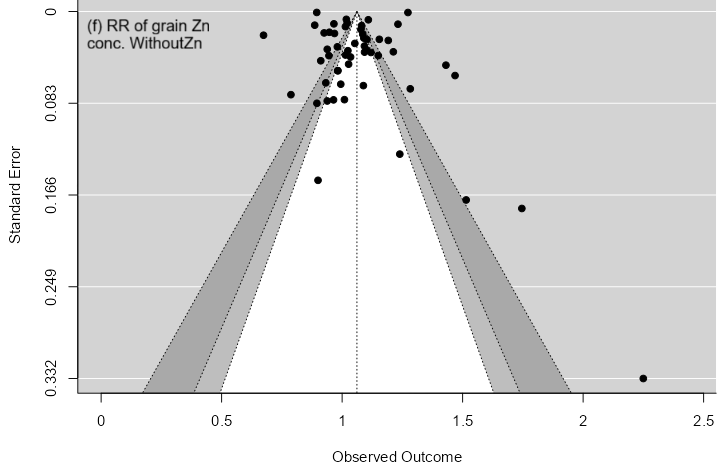 |
| 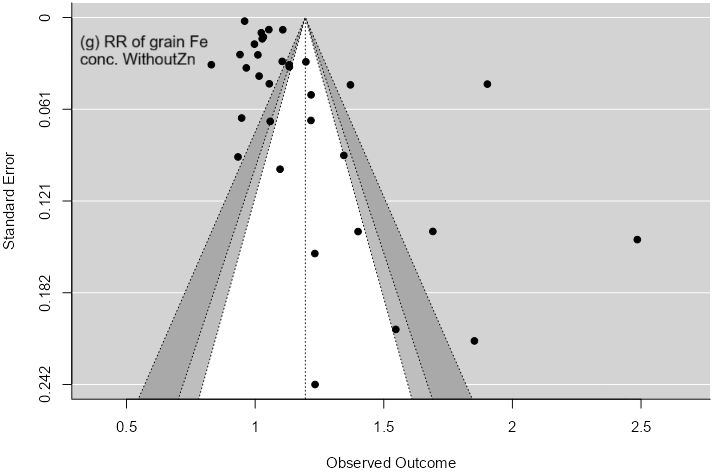 | 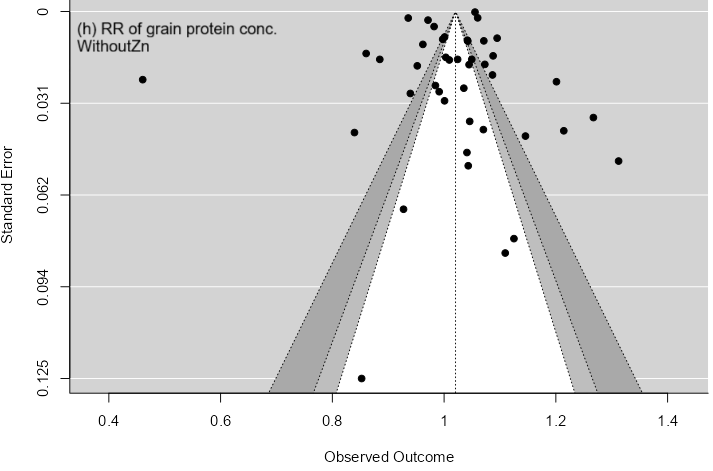 |

Figure S6. Funnel plots of response ratios of grain yield, grain Zn concentrations, grain Fe concentrations, and grain protein concentrations.

Statistical tests of heterogeneity and publication bias for the variables in the funnel plot above are presented below.

|  |  | Tests of heterogeneity | | | |  | Tests of publication bias | | |
| --- | --- | --- | --- | --- | --- | --- | --- | --- | --- |
| Treatment | Target variable (k) | *T*2 | *I*2 (%) | *H*2 | *Q* |  | Fail-safe N | Kendal’s tau | Egger’s regression |
| WithZn | Grain yield (124) | 0.024 | 99.5 | 199.1 | 5451*** |  | 24662878*** | 0.028ns | 5.94*** |
|  | Zn conc. (106) | 0.123 | 99.5 | 207.6 | 6613*** |  | 6767787*** | 0.268*** | 6.54*** |
|  | Fe conc. (24) | 0.021 | 99.3 | 143.6 | 635.9*** |  | 33977078*** | -0.138ns | 0.783ns |
|  | Protein conc. (46) | 0.011 | 99.40 | 135.0 | 1310*** |  | 7804515*** | 0.195ns | 4.11*** |
| WithoutZn | Grain yield (64) | 0.032 | 98.4 | 61.3 | 1126.5*** |  | 1734659*** | -0.077ns | 0.40ns |
|  | Zn conc. (53) | 0.022 | 99.8 | 584.0 | 89310*** |  | 7038179*** | 0.153ns | 3.25*** |
|  | Fe conc. (33) | 0.093 | 99.7 | 334.0 | 1322.0*** |  | 900530*** | 0.030ns | 3.94*** |
|  | Protein conc. (44) | 0.016 | 99.8 | 524.6 | 5199.8*** |  | 26029507*** | 0.202ns | 0.70ns |

Values followed by *, **, and *** are statistically significant at levels of 0.05, 0.01 and 0.001, while “ns” means non-significant

## Figure S7. LOESS plots of Zn application rate

| 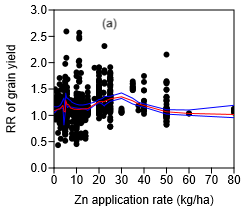 | 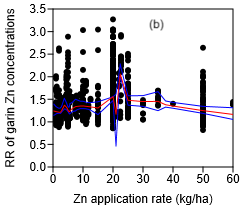 | 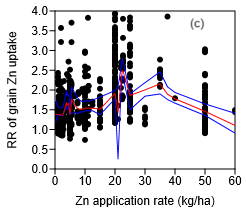 |
| --- | --- | --- |
| 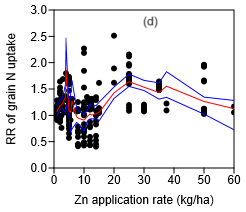 | 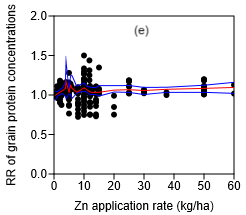 |  |

Figure S7. Trends (red lines) in response ratios of grain yield, grain Zn concentrations, Zn uptake, N uptake, and protein concentrations with Zn application rates to the soil.

Significant improvements in response to soil application of Zn are indicated when the 95% CIs (blue lines) fall above RR = 1. The blue lines represent boot-strapped 95% CIs of trend lines.

## Figure S8. LOESS plots of N application rate

| 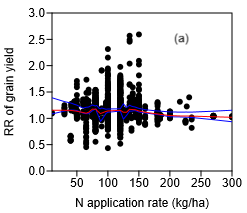 | 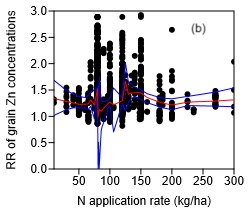 | 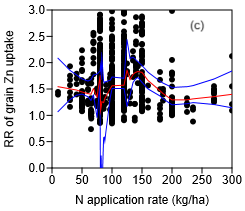 |
| --- | --- | --- |
| 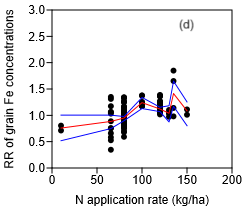 | 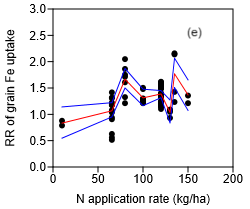 | 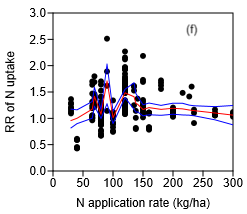 |
| 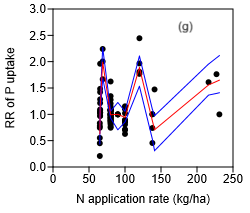 | 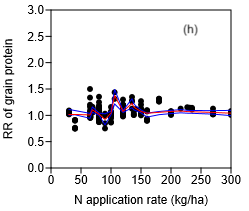 |  |

Figure S8. Trends (red lines) in response ratios of grain yield, grain Zn and Fe concentrations, Zn, Fe, and N uptake, and protein concentrations with N fertilizer application rates in treatments involving soil-applied N.

Significant improvements in response to soil application of N are indicated when the 95% CIs (blue lines) fall above RR = 1. The blue lines represent boot-strapped 95% CIs of trend lines.

## Figure S9. LOESS plots of P application rate

| 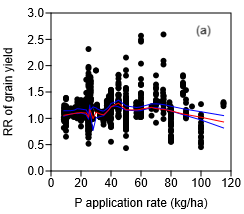 | 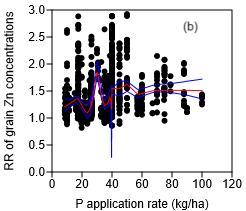 | 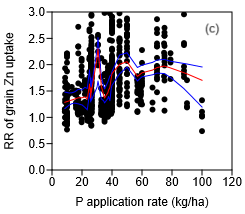 |
| --- | --- | --- |
| 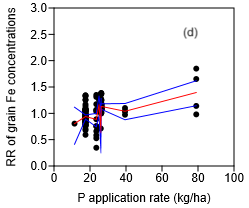 | 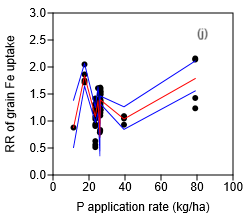 | 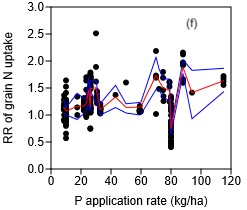 |
| 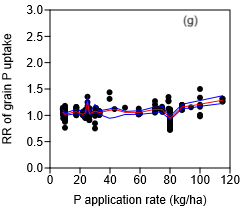 | 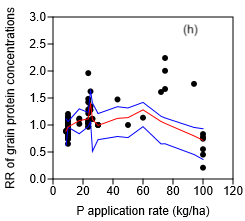 |  |

Figure S9. Trends (red lines) in response ratios of grain yield, grain Zn and Fe concentrations, Zn, Fe, and N uptake, and protein concentrations with P fertilizer application rates in treatments involving soil-applied P.

Significant improvements in response to soil application of P are indicated when the 95% CIs (blue lines) fall above RR = 1. The blue lines represent boot-strapped 95% CIs.

## Figure S10. LOESS plots of effects of available Zn

| 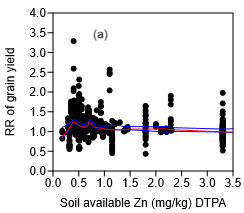 | 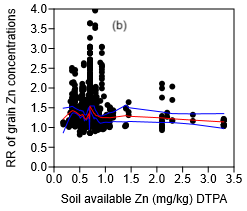 | 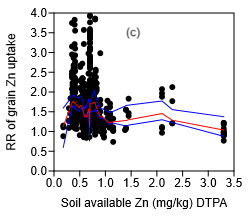 |
| --- | --- | --- |
| 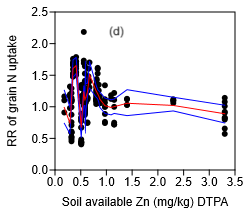 | 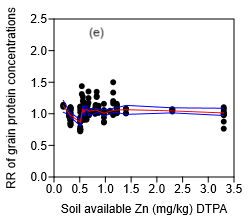 | 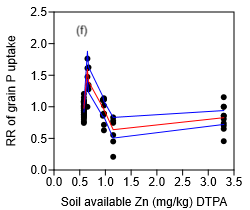 |

Figure S10. LOESS regression of response ratios of grain yield, grain Zn concentrations, Zn uptake, N uptake and protein concentrations following soil application of Zn. Significant improvements in response to soil application of Zn are indicated when the 95% CIs (blue lines) fall above RR = 1.
