# Supplementary material
Source: Research Square preprint supplement (doi:10.21203/rs.3.rs-9267207/v1)
Supplement: Supplementary file 2 [file 8e6cb1f8b7bfc822653bdfc5.docx]

# Supplementary Methods

## 1. Trait correlations, G×E interactions and heritability

### 1.1. Correlations between grain yield, Zn, Fe, protein and phytate concentrations

To gain insights into the potential for simultaneous improvement of grain Fe, Zn and protein with grain yield through either agronomic practices or traditional breeding techniques, we examined the correlations between grain yield, grain Zn, Fe, protein and phytate concentrations. Phytate has been included, as it inhibits the bioavailability to humans of bivalent cations, including Zn and Fe, contributing to nutrient deficiencies. It is not yet clear how the negative correlations affects yield, Zn, Fe and protein concentrations in rice when considered together. Therefore, we performed correlation analyses between grain yield, grain Zn, Fe, protein and phytate concentrations using the data compiled for the literature review. We limited the correlation analysis to studies that have reported two target variables concurrently and where the reported number of means was at least 10 to correctly estimate the Pearson correlation coefficient. We performed the correlation analysis separately for studies that evaluated rice germplasm and those studies that evaluated fertilization treatments. We had to exercise this extra caution in the interpretation of the Pearson correlation coefficient (*r*) for the following reasons: (1) the distribution of *r* is skewed toward zero even for large sample sizes (Fisher (1915); (2) the size of *r* depends, in part, on the reliability of the measurements for the variables being correlated; (3) if there are errors in measurement of any of the variables or the assumption of bivariate normality is violated, the sign of *r* can be negative even when the true correlation coefficient (*ρ*) is positive; (4) there is some uncertainty on how to properly calculate the standard error of correlation coefficients, and over 10 different estimators have been proposed Gnambs (2023). Simulation studies on the accuracy of these estimators indicate that all estimators are largely unbiased for sample sizes of 40 or more. For smaller samples, Gnambs (2023) showed that the estimator proposed by Bonett (2008) below gives the least biased standard error (σr):

where r is the Pearson correlation coefficient and N is the sample size. Therefore, we estimated the standard error (σr) for each of the correlation coefficients and then calculate the 95% (CIs) as CI ± t(σr), where t = 1.96 for. Accordingly, we declared a correlation coefficient significant if P <0.05 and the 95% CI does not encompass 0. Then, we calculated the proportion (in %) of studies that resulted in significantly positive, significantly negative and non-significant correlation coefficients (Table S4b) for each type of study. The type of study, the variables being correlated, the data source (the specific study), the total number of observations, the estimated correlation coefficients and their 95% CI and the two-tailed *P* values for each correlation have been summarized in Table S4c.

### 1.2. G×E interactions and heritability of grain yield, Zn, Fe and protein concentrations

To gain insights into the genetic and environmental control of grain Zn, Fe and protein concentrations in rice, we reviewed studies that have quantified G×E interactions and heritability of these traits. We searched for such studies in Google Scholar using the keywords: rice grain yield, grain zinc or iron or protein, and genotype by environment interaction. We used the same keywords in combination with heritability to locate studies that performed heritability of these phenotypes in rice. From the studies thus identified, we compiled estimates of the variance explained by the genotype, environment and the G×E interactions wherever available. In most publications the explained variance was not reported but the degrees of freedom and the mean square were reported. In such cases, we first calculated the sum of squares (SS) by multiplying the degrees of freedom with the mean squares. Then, we calculated the percentage explained variance for the genotype, environment and the interaction effect by dividing their respective SS by the total SS and multiplying by 100.

We compiled estimates of the broad-sense (H2) and narrow-sense (h2) heritability values of grain yield, grain Zn, Fe and protein concentrations from the primary studies. The broad-sense heritability is defined as the proportion of phenotypic variance that is attributable to the overall variance for the genotype, thus including additive, dominance, and epistatic variance (Covarrubias-Pazaran, 2019). The narrow-sense heritability is defined as the proportion of phenotypic variance due to additive genetic variation (Evans et al., 2018). To facilitate inferences, heritability was considered low if H2 <0.40, but medium if H2 is 0.40-0.59 and high if H2 > 0.60 following. However, a low heritability does not necessarily mean that the genetic variance is small. Low heritability can indicate that the error variance is large, which can be caused by high environmental influence (Covarrubias-Pazaran, 2019). The size of H2 is specific to the population, and often depends on the genetic variance in the population, the influence of the specific environment and on the accuracy of observations such as inaccurate phenotype recording or modelling errors (Covarrubias-Pazaran, 2019). The genetic variance in one population may also be different from that in another population. From the values compiled from the literature, we calculated the median and the range for inferences. However, we took the caveats above into consideration when drawing conclusions about heritability. We have listed the studies used in the review of the G×E interactions and heritability in supplementary Table S4.

## 2. Methodological challenges and limitations of this study

The major challenges faced in this analysis were (1) the small number of studies reporting nutrient concentrations in white rice; (2) incomplete description of the study sites, the rice cultivar used, fertilizer rates and irrigation regimes; (3) lack of directly measured soil properties and climate variables; and (5) selective reporting of only significant results. In the majority studies (n = 168), grain Zn concentrations were reported for brown rice and fewer studies (n= 38) reported on Zn for white rice. Similarly, the majority of studies (n = 77) reported grain Fe concentrations for brown rice and only 21 studies had reported this for white rice. This has limited our ability to analyse the variability in grain micronutrient concentrations and bioavailability in a more complete manner. Nutrient concentrations in brown rice are not informative as much of the nutrients are lost during processing to white rice.

In many of the studies the GPS coordinates, climatic and soil characteristics of the study sites were not reported. Even in studies where requisite variables such as soil pH, N, P, K, Zn and Fe were reported, the units of measurement were either missing or methods of measurement were highly variable. This has limited our ability to perform meta-analysis of the effect of most soil variables. In some studies, either vague statement such as “Fertilizers and irrigation were applied as per recommendations” or the fertilizer rates were not reported, or the form (e.g., elemental or oxide) was not indicated where reported. This has limited our ability to analyse effects of irrigation and fertilization in detail.

To make up for lack of directly measured soil properties and climate variables, some of the soil and climate variables were downloaded from existing databases using the GPS coordinates provided in the primary studies. Nevertheless, some of the analysis could not be pursued due to the inability to match soil and climate variables to the study sites. For example, variations in response ratios with soil type could not be pursued because most studies have not reported the soil type according to the World Reference Base for soil classification. It was also not possible to perform rigorous analyses of the association between grain nutrient concentrations and temperature or rainfall due to the incomplete reporting of these variables.

Incomplete reporting of background information especially on rice cultivars in the primary studies was another key challenge that limited in-depth analysis. Many studies have not either provided the cultivar name, the release date or the condition for which the cultivar was bred. As a result, it was not possible to group all rice cultivars into homogeneous categories (e.g., landraces vs modern varieties) and perform in-depth analysis revealing genotypic effects. The selective reporting of results including (1) reporting only main effects or significant interaction effects and (2) excluding interaction effects (e.g., cultivars, irrigation rates and nutrient treatments) has also limited inclusion of all available means in the meta-analysis. Another key limitation was our inability to analyse the residual effects of soil-applied Zn and Fe on the succeeding rice crop due to lack of long-term data. Only a few studies (e.g., Hafeez et al., 2013) have reported the residual effects of soil-applied Zn and Fe.

The review of G×E interactions was constrained by the lack of uniformity in the way analyses are conducted and the results are reported. Authors conduct analysis of G×E interactions in a variety of ways. Authors also rarely report the percentage of explained variance accounted by the genotype, environment and their interactions.

# References

Covarrubias-Pazaran GE (2019) Heritability: meaning and computation. A manual, Excellence in Breeding. <https://excellenceinbreeding.org/sites/default/files/manual/EiB-M2_Heritability_18-02-20.pdf>. Accessed: 23/02/2025

Fisher, R. A. (1915). Frequency distribution of the values of the correlation coefficient in samples from an indefinitely large population. *Biometrika* 10, 507-521.

Gnambs, T. (2023). A Brief Note on the Standard Error of the Pearson Correlation. *Collabra: Psychology* 9(1). <https://doi.org/10.1525/collabra.87615>.
