# Supplementary material
Source: Research Square preprint supplement (doi:10.21203/rs.3.rs-9267207/v1)
Supplement: Supplementary file 3 [file d0d6d9871e6060422f5e818f.doc]

Supplementary Tables

## Table S1. List of studies used for the review and meta-analysis

| Abera et al. 2021. Effect of rice variety and location on nutritional composition, physicochemical, cooking and functional properties of newly released upland rice varieties in Ethiopia. Cogent Food & Agriculture.7(1). DOI: 10.1080/23311932.2021.1945281 |
| --- |
| Alam et al. 2006. Nutrient management for increased productivity of rice-wheat cropping system in Bangladesh. Field Crops Research.96. DOI: 10.1016/j.fcr.2005.08.010 |
| Al-Daej 2022. Genetic studies for grain quality traits and correlation analysis of mineral element contents on Al-Ahsa rice and some different varieties (*Oryza Sativa* L.). Saudi Journal of Biological Sciences .29: 1893–1899. DOI: 10.1016/j.sjbs.2021.10.032 |
| Ali et al. 2014. Nitrogen and Zinc Interaction Improves Yield and Quality of Submerged Basmati Rice (*Oryza sativa* L.). Notulae Botanicae Horti Agrobotanici Cluj-Napoca.42(2). DOI: 10.15835/nbha4229469 |
| Ali et al. 2021. Zinc application improves the productivity and grain bio-fortification of fine rice. Pak. J. Agri. Sci..58(1), 95-102. DOI:10.21162/PAKJAS/21.9108 |
| Amanullah et al. 2020. Phosphorus and zinc fertilization improve zinc biofortification in grains and straw of coarse vs. fine rice genotypes. Agronomy 10: 1155. DOI: 10.3390/agronomy10081155 |
| Anago et al. 2023. Magnesium and zinc fertilisation improves rice yield and yield component responses to nitrogen, phosphorus, and potassium. South African Journal of Plant and Soil 40(2): 1–13.DOI: 10.1080/02571862.2023.2212190 |
| Anandan et al. 2011. Genotypic variation and relationships between quality traits and trace elements in traditional and improved rice (*Oryza sativa* L.) Genotypes. Journal Of Food Science.76(4). DOI: 10.1111/j.1750-3841.2011.02135.x |
| Anusha et al. 2021. Grain Fe and Zn content, heterosis, combining ability and its association with grain yield in irrigated and aerobic rice. Scientific reports.11(10579). DOI: 10.1038/s41598-021-90038-4 |
| Arif et al. 2016. Boron, zinc and microtone effects on growth, chlorophyll contents and yield attributes in rice (*Oryza sativa* L.) cultivar. African Journal of Biotechnology.11(48). DOI: 10.5897/AJB12.393 |
| Awio et al. 2021. Micro-nutrients in East African lowlands: Are they needed to intensify rice production? Field Crops Research .270: 108219. DOI: 10.1016/j.fcr.2021.108219 |
| Babu VR et al. 2012. Genetic variability studies for qualitative and quantitative traits in popular rice (*Oryza sativa* L) hybrids of India. Int J Scientific and Res Publ 2:2250–3153. |
| Bai, X. F. et al. 2011. Quantitative trait loci for rice yield-related traits using recombinant inbred lines derived from two diverse cultivars. J. Genet. 90: 209–215. DOI: 10.1007/s12041-011-0057-y. |
| Bana et al. 2022. Zinc-coated urea for enhanced zinc biofortification, nitrogen use efficiency and yield of basmati rice under typic fluvents. Sustainability.Sustainability.14(104). DOI: 10.3390/su14010104 |
| Baral et al. 2023. Interplay between nano zinc oxide-coated urea and summer green manuring in basmati rice under basmati rice-wheat cropping system: implications on yield response, nutrient acquisition and grain fortification. Frontiers in Sustainable Food Systems 7:1187717. DOI: 10.3389/fsufs.2023.1187717 |
| Barua & Saikia. 2018. Agronomic biofortification in rice varieties through zinc fertilization under aerobic condition. Indian Journal of Agricultural Research.52(1). DOI: 10.18805/IJARe.A-4733 |
| Baruah et al. 2006.Physiological analysis of growth, yield development and grain quality of some deep-water rice (*Oryza sativa* l.) cultivars. J. Agronomy & Crop Science .192: 228—232.NA |
| Bashir et al. 2021. Variations in soil nutrient dynamics and their composition in rice under integrated rice-crab co-culture system. Journal Of Cleaner Production 281(125222). DOI: 10.1016/j.jclepro.2020.125222 |
| Behera et al. 2022. GGE bi-plot analysis of high-zinc rice (*Oryza sativa* L.) genotypes under multiple environments for grain yield. Applied Ecology and Environmental Research 20(5). DOI: 10.15666/aeer/2005_41574172 |
| Bekele DB et al. 2013. Genetic evaluation of recombinant inbred lines of rice (*Oryza sativa* L) for grain Zinc concentrations, yield related traits and identification of associated SSR markers. Pak J Biol Sci 6:1714–1721 |
| Biswas et al. 2018. Zinc fortification: Effect of polishing on parboiled and unparboiled rice. Current Plant Biology 16. DOI: 10.1016/j.cpb.2018.11.002 |
| Bodeerath et al. 2024. Variation of grain zinc, phytate concentration and phytate: Zn molar ratio in unpolished and polished rice affected by foliar zinc application among Thai rice varieties. Plant Production Science .27:4, 304-319. DOI: 10.1080/1343943X.2024.2412867 |
| Boonchuay et al. 2013. Effect of different foliar zinc application at different growth stages on seed zinc concentration and its impact on seedling vigor in rice. Soil Science and Plant Nutrition.59(2). DOI: 10.1080/00380768.2013.763382 |
| Bughio et al. 2021. Enhancement of zinc concentration and bioavailability in rice grains by zinc application methods. Pakistan Journal of Agricultural Sciences.58(5). DOI: 10.21162/PAKJAS/21.9922 |
| Butsai et al. 2022. Effect of Iron Application on Rice Plants in Improving Grain Nutritional Quality in Northeastern of Thailand.Sustainability.14(15756). DOI: 10.3390/su142315756 |
| Calayugan et al. 2020. Genetic Analysis of Agronomic Traits and Grain Iron and Zinc Concentrations in a Doubled Haploid Population of Rice (*Oryza sativa* L.). Sci Rep 10: 2283. DOI: 10.1038/s41598-020-59184-z. | |
| Chandra et al. 2023. Performance evaluation of rice varieties and their response to zinc nutrition in uplands. Journal of Tropical Agriculture .61(1): 1-7.NA | |
| Chattha et al. 2023. Foliar applied zinc on different growth stages to improves the growth, yield, quality and kernel bio-fortification of fine rice. Notulae Botanicae Horti Agrobotanici Cluj-Napoca.51(2). DOI: 10.15835/nbha51213221 | |
| Chaudhary et al. 2022. Consequence of Sesbania as brown manure along with foliar spray of iron and zinc sulphate on production potential of direct-seed rice (*Oryza sativa*) in calcareous soil. Indian Journal of Agronomy.67(4). DOI: 10.59797/ija.v67i4.136 | |
| Chen et al. 2019. Analysis of Quality Involving in Minerals, Amylose, Protein, Polyphenols and Antioxidant Capacity in Different Coloured Rice Varieties. Food Science and Technology Research.25 (1). DOI: 10.3136/fstr.25.141 | |
| Choudhary et al. 2022. Rice Productivity, Zn Biofortification, and Nutrient-Use Efficiency as Influenced by Zn Fertilization Under Conventional Transplanted Rice and the System of Rice Intensification. Frontiers In Environmental Science.10. DOI: 10.3389/fenvs.2022.869194 | |
| Coffin & Slaton. 2020. Effect of low-use-rate zinc fertilization on rice growth and grain yield. Agrosyst Geosci Environ 3: e20016. DOI: 10.1002/agg2.20016 | |
| Dass et al. 2017. Agronomic fortification of rice grains with secondary and micronutrients under differing crop management and soil moisture regimes in the north Indian Plains. Paddy And Water Environment 3(1). DOI: 10.1007/s10333-017-0588-9 | |
| Debnath et al. 2015. Improving use efficiency of applied phosphorus fertilizer by zinc fertilization in Basmati rice-wheat cropping system. Indian Journal of Agricultural Research 49(5). DOI: 10.18805/ijare.v49i5.5803 | |
| Deng et al. 2022. Water and nitrogen management at the booting stage affects yield, grain quality, nutrient uptake, and use efficiency of fragrant rice under the agro-climatic conditions of south China. Front. Plant Sci. .13:907231. DOI: 10.3389/fpls.2022.907231 | |
| Denre et al. 2017. Effect of Zinc Application on Zn Content and Uptake in Grain, Husk and Straw of Hybrid Rice (*Oryza sativa* L.).18(1). DOI: 10.9734/IJPSS/2017/33888 | |
| Dey et al. 2023.Iron pulsing, a cost effective and affordable seed invigoration technique for iron bio-fortification and nutritional enrichment of rice grains. Plant Growth Regulation.100. DOI: 10.1007/s10725-022-00957-z | |
| Dheebakaran et al. 2019. Screening of short duration rice genotypes for zinc efficiency. Journal of Experimental Biology and Agricultural Sciences 7(1). DOI: 10.18006/2019.7(1).25.33 | |
| Duan et al. 2012. Long-term fertilization with pig-biogas residues results in heavy metal accumulation in paddy field and rice grains in Jiaxing of China. Soil Science and Plant Nutrition 58: 637–646. DOI: 10.1080/00380768.2012.726597 | |
| Elekhtyar et al. 2023. Effect of Foliar Application of Phosphorus, Zinc, and Silicon Nanoparticles along with Mineral NPK Fertilization on Yield and Chemical Compositions of Rice (*Oryza sativa* L.). Agriculture.13(1061). DOI: 10.3390/agriculture13051061 | |
| Elshayb et al. 2022. The Integrative Effects of Biochar and ZnO Nanoparticles for Enhancing Rice Productivity and Water Use Efficiency under Irrigation Deficit Conditions.13(1061). DOI: 10.3390/plants11111416 | |
| El-Sobky et al. 2022. Zinc-biochemical co-fertilization improves rice performance and reduces nutrient surplus under semi-arid environmental conditions. Saudi Journal of Biological Sciences .29: 1653–1667. DOI: 10.1016/j.sjbs.2021.10.066 | |
| Fahad et al. 2015. Effects of tire rubber ash and zinc sulfate on crop productivity and cadmium accumulation in five rice cultivars under field conditions. Environmental Science and Pollution Research 22. DOI: 10.1007/s11356-015-4518-3 | |
| Fakharzadeh et al. 2020. Using nanochelating technology for biofortification and yield increase in rice. Scientific Reports 10: 4351. DOI: 10.1038/s41598-020-60189-x | |
| Fan et al. 2012. Growth and iron uptake of lowland and aerobic rice genotypes under flooded and aerobic cultivation. Communications In Soil Science and Plant Analysis 43. DOI: 10.1080/00103624.2012.684826 | |
| Farooq et al. 2018. Application of zinc improves the productivity and biofortification of fine grain aromatic rice grown in dry seeded and puddled transplanted production systems. Field Crops Research .216: 53–62. DOI: 10.1016/j.fcr.2017.11.004 | |
| Firdous et al. 2018. The effect of zinc fertilization on rice productivity and economics in acid alfisol of Jharkhand, India. Int. J. Curr. Microbiol. App. Sci. 7: 2676-2682. | |
| Firdous et al., 2016. Study of translocation pattern of zinc at different growth stages in rice. Green Farming 7(5): 1134-1137.NA | |
| Fu et al. 2010. Effect of foliar application of zinc and iron fertilizers on distribution of zinc and iron, quality and yield of rice grain. Scientia Agricultura Sinica.43(24). DOI: 10.3864/j.issn.0578-1752.2010.24.004 | |
| Fu et al. 2024.The Potential Role of Zinc and Silicon in Improving Grain Yield and Lodging Resistance of Rice (*Oryza sativa* L.). Agronomy. 14: 91. DOI: 10.3390/agronomy14010091 | |
| Gande, N. K. et al. 2013. Evaluation of recombinant inbred lines of rice (*Oryza sativa* L.) for grain zinc content, yield related traits and identification of transegressant lines grown under aerobic conditions. Asian J. Exp. Biol. Sci. 4(4), 567–574. | |
| Gandebe et al. 2017a.Changes in Some Nutritional and Mineral Components of Nerica Rice Varieties as Affected by Field Application with Mycorrhiza and Chemical Fertilizer in Northern Cameroon. Food and Nutrition Sciences.8. DOI: 10.4236/fns.2017.88059 | |
| Gandebe et al. 2017b. Agronomic Adaptability of Some Selected Nerica Rice Varieties in Response to Biofertilizer Application in Northern Cameroon. Journal of Experimental Agriculture International.15(5): 1-12. DOI: 10.9734/JEAI/2017/31878 | |
| Gangmei and George 2017. Black rice CV. ‘Chakhao Amubi’ (*Oryza sativa* L.) Response to organic and inorganic sources of nutrients on growth, yield and grain protein content. Journal of Pharmacognosy and Phytochemistry.6(4): 550-555. | |
| Ghasal et al. 2016.Zinc fertilization enhances growth and quality parameters of aromatic rice (*Oryza sativa* L.) varieties. Indian Journal of Plant Physiology.21.DOI: 10.1007/s40502-016-0243-2 | |
| Ghasal et al. 2018.Zinc partitioning in basmati rice varieties as influenced by Zn fertilization. Crop Journal.6(2). DOI: 10.1016/j.cj.2017.09.001 | |
| Ghasemi et al. 2017.Effect of foliar application of zinc nano oxide on agronomic traits of two varieties of rice (*Oryza sativa* L.). Crop Research.52(6). DOI: 10.5958/2454-1761.2017.00017.1 | |
| Gogoi et al. 2016.Enrichment of rice grains with zinc through agronomic bio-fortification. Journal of the Indian Society of Soil Science.64(4). DOI: 10.5958/0974-0228.2016.00053.0 | |
| Gogoi et al. 2024.Grain iron and zinc content is independent of anthocyanin accumulation in pigmented rice genotypes of Northeast region of India. Scientific reports. 14 (4128). DOI: 10.1038/s41598-024-53534-x | |
| Goloran et al. 2019.Grain Zn concentrations and yield of Zn-biofortified versus Zn-efficient rice genotypes under contrasting growth conditions. Field Crops Research.234.DOI: 10.1016/j.fcr.2019.01.011 | |
| Gu et al. 2023.Insufficient Zn uptake reduces rice grain yield in integrated rice-crayfish culture – a case study in the Jianghan Plain, China. Archives of Agronomy and Soil Science 69: 861–874. DOI: 10.1080/03650340.2022.2042471 | |
| Guo et al. 2015.Effects of soil zinc availability, nitrogen fertilizer rate and zinc fertilizer application method on zinc biofortification of rice. Journal of Agricultural Science. 154: 584-597. DOI: 10.1017/S0021859615000441 | |
| Hafeez et al. 2013. Direct and residual effects of zinc on zinc-efficient and zinc-inefficient rice genotypes grown under low-zinc-content submerged acidic conditions. Communications in Soil Science and Plant Analysis 44: 2233–2252. DOI: 10.1080/00103624.2013.803558 | |
| Haque et al. 2015. Long-term effects of sulfur and zinc fertilization on rice productivity and nutrient efficiency in double rice cropping paddy in Bangladesh. Communications In Soil Science and Plant Analysis 46. DOI: 10.1080/00103624.2015.1104333 | |
| Haque et al. 2019. Effect of long-term chemical and organic fertilization on rice productivity, nutrient use-efficiency, and balance under a rice-fallow-rice system. Journal of Plant Nutrition. DOI: 10.1080/01904167.2019.1659338 | |
| Harish et al. 2018. Influence of promising rice (*Oryza sativa*) varieties and nutrient-management practices on micronutrient biofortification and soil fertility in Eastern Himalayas. Indian Journal of Agronomy .63 (3): 377.NA | |
| Harish et al. 2018. Influence of promising rice (*Oryza sativa*) varieties and nutrient-management practices on micronutrient biofortification and soil fertility in Eastern Himalayas. Indian Journal of Agronomy .65 (3): 377.NA | |
| Hasan et al. 2023. Growth and yield performance of hybrid rice varieties under varying zinc levels. Archives of Agriculture and Environmental Science.8(3). DOI: 10.26832/24566632.2023.080302 | |
| Hazra et al. 2015. Screening of Rice Cultivars for their Zinc Biofortification Potential in Inceptisols.63(3). DOI: 10.5958/0974-0228.2015.00045.6 | |
| He et al. 2013. Iron concentration, bioavailability, and nutritional quality of polished rice affected by different forms of foliar iron fertilizer. Food Chemistry.141(4). DOI: 10.1016/j.foodchem.2013.07.005 | |
| He et al. 2016. Effects of alkaline and bioorganic amendments on cadmium, lead, zinc, and nutrient accumulation in brown rice and grain yield in acidic paddy fields contaminated with a mixture of heavy metals. Environ Sci Pollut Res.23. DOI: 10.1007/s11356-016-7593-1 | |
| Hoseinzade et al. 2016. Rice (*Oryza sativa* L.) nutrient management using mycorrhizal fungi and endophytic Herbaspirillum seropedicae. Journal of Integrative Agriculture 15(6). DOI: 10.1016/S2095-3119(15)61241-2 | |
| Hossain et al. 2008. The requirement of zinc for improvement of crop yield and mineral nutrition in the maize–mungbean–rice system. Plant Soil 306:13–22.DOI 10.1007/s11104-007-9529-5 | |
| Hu et al. 2002. Determination of selenium concentration in rice and the effect of foliar application of Se-enriched fertiliser or sodium selenite on the selenium content of rice. Journal of the Science of Food and Agriculture.82.DOI: 10.1002/jsfa.1115 | |
| Hu et al. 2022. Seed priming with selenium: Effects on germination, seedling growth, biochemical attributes, and grain yield in rice growing under flooding conditions. Plant Direct.6:e378. DOI: 10.1002/pld3.378 | |
| Huang et al. 2016. Variation in mineral elements in grains of 20 brown rice accessions in two environments. Food Chemistry.192.DOI: 10.1016/j.foodchem.2015.07.087 | |
| Hussain et al. 2021. A Field Evidence of Cd, Zn and Cu Accumulation in Soil and Rice Grains after Long-Term (27 Years) Application of Swine and Green Manures in a Paddy Soil. Sustainability. 13(4). DOI: 10.3390/su13042404 | |
| Imade et al. 2017. Effect of integrated nutrient management on growth, yield and quality of rice. bulletin of environment, Pharmacology and Life Sciences.6: 352-355.NA | |
| Imran et al. 2015. Efficacy of zinc application methods for concentration and estimated bioavailability of zinc in grains of rice grown on a calcareous soil. Pak. J. Agri. Sci..52(1), 169-175.NA | |
| Islam et al. 2021. Effect of Soil Application of Zinc on Growth, Yield and Zinc Concentration in Rice Varieties. European Journal of Agriculture and Food Sciences.3(6). DOI: 10.24018/ejfood.2021.3.6.425 | |
| Itani et al. 2002. Distribution of amylose, nitrogen, and minerals in rice kernels with various characters. J Agric Food Chem. .50: 5326-32. .doi: 10.1021/jf020073x. PMID: 12207469. | |
| Izhar et al. 2024. Study of high iron and high zinc contents varieties of rice in Jharkhand condition through biofortification. International Journal of Advanced Biochemistry Research. 8(4). DOI: 10.33545/26174693.2024.v8.i4e.995 | |
| Jaksomsak et al. 2017. Responses of grain zinc and nitrogen concentration to nitrogen fertilizer application in rice varieties with high-yielding low-grain zinc and low-yielding high grain zinc concentration. Plant Soil.411. DOI: 10.1007/s11104-016-3056-1 | |
| Jaksomsak et al. 2018. The impact of foliar applied zinc fertilizer on zinc and phytate accumulation in dorsal and ventral grain sections of four thai rice varieties with different grain zinc. Journal of Cereal Science.NA. Doi: 10.1016/j.jcs.2017.09.004 | |
| Jaksomsak et al. 2021.Variation in nutritional quality of pigmented rice varieties under different water regimes. Plant Production Science.24:2, 244-255.DOI: 10.1080/1343943X.2020.1819164 | |
| Jat et al. 2011. Dual purpose summer legumes and zinc fertilization for improving productivity and zinc utilization in aromatic hybrid rice (*Oryza sativa*). Indian Journal of Agronomy. 56 (4). DOI: 10.59797/ija.v56i4.4711 | |
| Jat et al. 2014. Effect of dual-purpose summer legumes and zinc fertilization on system productivity, economics and nutrient use-efficiencies of rice (*Oryza sativa*)– wheat (Triticum aestivum) cropping system. Indian Journal of Agricultural Sciences.84 (8). DOI: 10.56093/ijas.v84i8.43075 | |
| Joy et al. 2017. Elemental composition of Malawian rice. Environmental Geochemistry and Health.39. DOI: 10.1007/s10653-016-9854-9 | |
| Kaizzi et al. 2024. Agronomic and economic benefits of primary and secondary micronutrients in selected fertilizer applications in rice production in Uganda. Uganda Journal of Agricultural Sciences.22: 69 – 77.DOI: 10.4314/ujas.v22i2.6 | |
| Kandil et al. 2022. Zinc Nutrition Responses to Agronomic and Yield Traits, Kernel Quality, and Pollen Viability in Rice (*Oryza sativa* L.). Frontiers in Plant Science.13:791066. Doi: 10.3389/fpls.2022.791066 | |
| Karak et al. 2005. Comparative efficacy of ZnSO4 and Zn-EDTA application for fertilization of rice (Oryza *sativa* L.). Archives of Agronomy and Soil Science .51(3).DOI: 10.1080/03650340400026701 | |
| Karmakar et al. 2024. Effect of zinc application on growth, yield, zinc uptake and zinc use indices of rice. International Journal of Economic Plants.11(3). DOI: 10.23910/2/2024.5423a | |
| Khampuang et al. 2020. Foliar zinc application improved grain zinc accumulation and bioavailable zinc in unpolished and polished rice. Plant Production Science 24: 94–102. DOI: 10.1080/1343943X.2020.1797512 | |
| Khan et al. 2021. Trace Metal Accumulation in Rice Variety Kainat Irrigated with Canal Water. Sustainability.13.DOI: 10.3390/su132413739 | |
| Kheyri et al. 2018. Effect of different resources and methods of silicon and zinc application on agronomic traits, nutrient uptake and grain yield of rice (*oryza sativa* l.). Applied Ecology and Environmental Research.16(5):5781-5798. DOI: 10.15666/aeer/1605_57815798 | |
| Kone et al. 2014. Nutrient constraint of rainfed rice production in foot slope soil of Guinea Forest in Côte d’Ivoire. Archives of Agronomy and Soil Science.60: 735–746.DOI: 10.1080/03650340.2013.836595 | |
| Kumar et al. 2017. Effect of different zinc management practices on growth, yield, protein content, nutrient uptake and economics on rice under partially reclaimed salt-affected soil. Journal of Pharmacognosy and Phytochemistry .6(5): 638-640.NA | |
| Kumar et al. 2017a. Bioavailability of iron and zinc as affected by phytic acid content in rice grain. Journal of Food Biochemistry. 41(6). DOI: 10.1111/jfbc.12413 | |
| Kumar et al. 2017b. Water productivity, nutrients uptake and quality of aerobic rice as influenced by varieties and iron nutrition. Paddy and Water Environment.15. DOI: 10.1007/s10333-017-0595-x | |
| Kumar et al. 2017c. Effect of zinc application on biological yields of hybrid rice (*Oryza sativa* L.) under low land situation in Jharkhand, India. Research Journal of Chemical and Environmental Science.5: 51-55.NA | |
| Kumar et al. 2020. Effect of integrated use of organic and chemical fertilizers on growth, yield and micronutrients uptake in rice (*Oryza sativa*) - Wheat (Triticum aestivum) system. Journal of the Indian Society of Soil Science.68(1). DOI: 10.5958/0974-0228.2020.00009.2 | |
| Kumar et al. 2021. Phenophase-based nitrogen and zinc scheduling for yield and zinc biofortification of direct-seeded rice (*Oryza sativa*). Indian Journal of Agronomy 66 (1): 87-90. | |
| Kumar et al. 2022. Tillage based Crop Establishment Methods and Zinc Application Enhances Productivity, Grain Quality, Profitability and Energetics of Direct-Seeded Rice in Potentially Zinc-Deficient Soil in the Subtropical Conditions of India. Communications in Soil Science and Plant Analysis 53(9). DOI: 10.1080/00103624.2022.2043340 | |
| Kumar et al. 2023. The diversity of phytic acid content and grain processing play decisive role on minerals bioavailability in rice. Journal of Food Composition and Analysis .115: 105032. DOI: 10.1016/j.jfca.2022.105032 | |
| Kummsa et al. 2022. Cereal grain mineral micronutrient and soil chemistry data from GeoNutrition surveys in Ethiopia and Malawi. Sci Data.9(443). DOI: 10.1038/s41597-022-01500-5 | |
| Kuppusamy et al. 2018. Does long-term application of fertilizers enhance the micronutrient density in soil and crop? —Evidence from a field trial conducted on a 47-year-old rice paddy. J Soils Sediments.18.DOI: 10.1007/s11368-017-1743-z | |
| Laenoi et al. 2018. Seasonal variation in grain yield and quality in different rice varieties. Field Crops Research .221: 350-357. DOI: 10.1016/j.fcr.2017.06.006 | |
| Laik et al. 2019. Zinc fertilization in rice-wheat cropping system under upland calcareous soil. Journal of Plant Nutrition. NA. DOI: 10.1080/01904167.2018.1482916 | |
| Lan et al. 2022. Effects of Application of Pig Manure on the Accumulation of Heavy Metals in Rice. Plants 11(2). DOI: 10.3390/plants11020207 | |
| Lee et al. 2014. Genotypic, grain morphological and locality variation in rice phytate content and phytase activity. Emir. J. Food Agric.26 (10): 844-852.doi: 10.9755/ejfa.v26i10.18503 | |
| Lei et al. 2017. Exogenous application of mixed micro-nutrients improves yield, quality and 2-acetyl-1-pyrroline contents in fragrant rice. Applied Ecology and Environmental Research. 15(3). DOI: 10.15666/aeer/1503_10971109 | |
| Li et al. 2012. Identification of rice cultivars with low brown rice mixed cadmium and lead contents and their interactions with the micronutrients iron, zinc, nickel and manganese. Journal of Environmental Sciences .24: 1790–1798. DOI: 10.1016/S1001-0742(11)60972-8 | |
| Li et al. 2015. Impact of phytic acid on nutrient bioaccessibility and antioxidant properties of dehusked rice. J Food Sci Technol.52: 7806–7816. DOI 10.1007/s13197-015-1918-9 | |
| Li et al. 2023. Cultivar-specific response of rhizosphere bacterial community to uptake of cadmium and mineral elements in rice (*Oryza sativa* L.). Ecotoxicology and Environmental Safety .249. DOI: 10.1016/j.ecoenv.2022.114403 | |
| Liang et al. 2008. Milling characteristics and distribution of phytic acid and zinc in long-, medium- and short-grain rice. Journal of Cereal Science .48: 83–91. Doi:10.1016/j.jcs.2007.08.003 | |
| Liang et al.2007. Iron, zinc and phytic acid content of selected rice varieties from China. Journal of the Science of Food and Agriculture .87:504–510.NA | |
| Liu et al. 2017. Application of silicon fertilizer affects nutritional quality of rice. Chilean Journal of Agricultural Research.77(2). DOI: 10.4067/S0718-58392017000200163 | |
| Liu et al. 2017. Effects of growing seasons and genotypes on the accumulation of cadmium and mineral nutrients in rice grown in cadmium contaminated soil. Science of the Total Environment. DOI: 10.1016/j.scitotenv.2016.11.115 | |
| Longvah et al. 2021. Nutrient diversity in 251 Indian rice germplasms and dietary nutrient supply through rice in rice based diets. LWT - Food Science and Technology .148: 111721.DOI: 10.1016/j.lwt.2021.111721 | |
| Longvah et al. 2021. Nutrient variability of rice landraces (*Oryza sativa* L.) from Manipur, Northeast India and its nutrients supply potential in rice-based diets. Nutrition & Food Science.Vol.52 (7). DOI 10.1108/NFS-10-2021-0296 | |
| Mabesa et al. 2013. Contrasting grain-Zn response of biofortification rice (*Oryza sativa* L.) breeding lines to foliar Zn application. Field Crops Research 149. DOI: 10.1016/j.fcr.2013.05.012 | |
| Madhubabu et al 2020. Assessment of genetic variability for micronutrient content and agromorphological traits in rice (*Oryza sativa* L.). Indian J. Genet. 80(2). DOI: 10.31742/IJGPB.80.2.2 | |
| Maganti et al. 2019. Variation in Iron and Zinc Content in Traditional Rice Genotypes. Agricultural Research.9.DOI: 10.1007/s40003-019-00429-3 | |
| Mahmoodi et al. 2020. Effects of Foliar Application of Liquid Fertilizer on Agronomical and Physiological Traits of Rice (*Oryza sativa* L.). Acta Agrobotanica. 73(3). DOI: 10.5586/aa.7332 | |
| Mandal & Ghosh. 2021. Response of Rice (*Oryza sativa* L.) to Soil and Foliar Application of Nano-ZnO and Bulk Zn-fertilizer in Red Acidic Soil of West Bengal, India. Egyptian Journal of Soil Science.61(2). https://dx.doi.org/10.21608/ejss.2021.79007.1451 | |
| Mangueze et al. 2018. Simultaneous Zinc and selenium biofortification in rice. Accumulation, localization and implications on the overall mineral content of the flour. Journal of Cereal Science.82.DOI: 10.1016/j.jcs.2018.05.005 | |
| Marques et al. 2020. Quantification and Tissue Localization of Selenium in Rice (*Oryza sativa* L., Poaceae) Grains: A Perspective of Agronomic Biofortification. Plants .9, 1670; Doi:10.3390/plants9121670 | |
| Marques et al. 2021. Effect of Rice Grain (*Oryza sativa* L.) Enrichment with Selenium on Foliar Leaf Gas Exchanges and Accumulation of Nutrients.Plants.10(2). DOI: 10.3390/plants10020288 | |
| Marques et al. 2023. Elemental Composition and Implications on Brown Rice Flour Biofortified with Selenium.Plants.12(8). DOI: 10.3390/plants12081611 | |
| Marr et al. 1999. The effect of nitrogen fertiliser on yield, nitrogen and mineral elements in Australian brown rice. Australian Journal of Experimental Agriculture.39. DOI: 10.1071/EA98033 | |
| Meena et al. 2018. Nitrogen and zinc scheduling for zinc biofortification in direct seeded rice (*Oryza sativa*). Indian Journal of Agricultural Sciences.88(5). DOI: 10.56093/ijas.v88i5.80099 | |
| Mehta et al. 2023. Response of Direct Seeded Rice to Iron and Zinc Fertilization Strategies under Middle Gujarat Conditions. International Journal of Plant & Soil Science.35(18). DOI: 10.9734/ijpss/2023/v35i183378 | |
| Mi et al. 2023. Zinc oxide nanoparticles enhanced rice yield, quality, and zinc content of edible grain fraction synergistically. Frontiers in Plant Science.14.DOI: 10.3389/fpls.2023.1196201 | |
| Moulick et al. 2022. Interrelationship Among Rice Grain Arsenic, Micronutrients Content and Grain Quality Attributes: An Investigation from Genotype × Environment Perspective. Frontiers in Environmental Science.10.DOI: 10.3389/fenvs.2022.857629 | |
| Mrudhula et al. 2021. Effect of nitrogen levels on growth, yield, nitrogen uptake and economics of rice variety BPT 2782- Bhavathi. International Journal of Chemical Studies .9(1): 2496-2499.DOI: 10.22271/chemi.2021.v9.i1ai.11603 | |
| Mrudhula et al. 2023. Effect of Nutrient management on growth, yield and quality parameters of black rice. Eco. Env. & Cons. 29: (S181-S186). http://doi.org/10.53550/EEC.2023.v29i05s.031 | |
| Mtengeti et al. 2016. Effect of improved plant nutrition on maize (*zea mays*) and rice (*oryza sativa*) grain chemical nutrient content under smallholder farming systems in Tanzania. Climate Change and Multi-Dimensional Sustainability in African Agriculture: Climate Change and Sustainability in Agriculture. http://doi.org/10.1007/978-3-319-41238-2_26 | |
| Munir et al. 2020. Phenology and yield of coarse and fine rice under varying levels of zinc and farmyard manure. Pakistan Journal of Botany52(2). DOI: 10.30848/PJB2020-2(35) | |
| Muthumanickam et al. 2022. Combined application of chemical fertilizers, organics and foliar spray of zinc and iron on yield, quality and water productivity of aerobically grown rice (*Oryza sativa*) in calcareous soil. Journal of Plant Nutrition. DOI: 10.1080/01904167.2022.2161390 | |
| Naeem et al. 2022. Biofortification of Diverse Basmati Rice Cultivars with Iodine, Selenium, and Zinc by Individual and Cocktail Spray of Micronutrients.Agronomy.12(1). DOI: 10.3390/agronomy12010049 | |
| Naik & Das 2008. Relative performance of chelated zinc and zinc sulphate for lowland rice (*Oryza sativa* L.). Nutrient Cycling in Agroecosytems.81.DOI: 10.1007/s10705-007-9158-7 | |
| Naik et al. 2020. Genotype × Environment interactions for grain iron and zinc content in rice.N/A.N/A.doi:10.1002/jsfa.10454 | |
| Nandy et al. 2023. Effect of Integrated Nutrient Management and Foliar Spray of Zinc in Nanoform on Rice Crop Nutrition, Productivity and Soil Chemical and Biological Properties in Inceptisols. Journal of Soil Science and Plant Nutrition.23.DOI: 10.1007/s42729-022-01064-8 | |
| Nath et al. 2022. Grain characteristics, proximate composition, phytochemical capacity, and mineral content of selected aromatic and non-aromatic rice accessions commonly cultivated in the North-East Indian plain belt. Applied Food Research .2: 100067.DOI: 10.1016/j.afres.2022.100067 | |
| Nayak et al. 2023. Non-Biofortified Rice Variety Responds More to Zinc Fertilization Than Biofortified Variety in Terms of Zinc Translocation and Biofortification. Journal of Soil Science and Plant Nutrition.23.DOI: 10.1007/s42729-023-01247-x | |
| Nazir et al. 2016. Effectiveness of Zinc Coated, Blended and Bio-Activated Zinc Coated Urea to Quality, Biochemical Parameters and Yield in Rice Crop (*Oryza sativa* L.). Pakistan Journal of Agricultural Research.34(3). DOI: 10.17582/journal.pjar/2021/34.3.524.532 | |
| Norton et al. 2014. Genome wide association mapping of grain arsenic, copper, molybdenum and zinc in rice (*Oryza sativa* L.) grown at four international field sites. Doi:10.1371/journal.pone.0089685.PLoS ONE .9(2):e89685. DOI: 10.1371/journal.pone.0089685 | |
| Norton GJ, Deacon CM, Xiong L, Huang S, Meharg AA, Price AH 2010. Genetic mapping of the rice ionome in leaves and grain: identification of QTLs for 17 elements including arsenic cadmium iron and selenium. Plant Soil 329:139–153 | |
| Nortona et al. 2017. Impact of alternate wetting and drying on rice physiology, grain production, and grain quality. Field Crops Research .205: 1–13.DOI: 10.1016/j.fcr.2017.01.016 | |
| Oahiduzzaman et al. 2016. Different zinc levels on growth, yield and nutrient content of BRRI dhan 33. Journal of Bioscience and Agriculture Research.9(2). https://dx.doi.org/10.18801/jbar.090216.99 | |
| Oko et al. 2012. Comparative Analysis of the Chemical Nutrient Composition of Selected Local and Newly Introduced Rice Varieties Grown in Ebonyi State of Nigeria. International Journal of Agriculture and Forestry.2(2). https://dx.doi.org/10.5923/j.ijaf.20120202.04 | |
| Padhan et al. 2020. Linkage disequilibrium mapping for grain Fe and Zn enhancing QTLs useful for nutrient dense rice breeding. BMC Plant Biology 20(57). DOI: 10.1186/s12870-020-2262-4 | |
| Pal and Sasmal 2020. Influence of integrated nutrition on yield, nutrient uptake and quality of aromatic rice in an Inceptisol. Agricultural Research .9(2):197–202.DOI: 10.1007/s40003-019-00418-6 | |
| Panda et al. 2024. Nutritional analysis of rice landraces from southern Odisha, India. Food Science & Nutrition.12(1). DOI: 10.1002/fsn3.3756 | |
| Parte et al. 2023. Exploring the Hidden Potential of Traditional Rice Landraces and Mutants for Iron and Zinc Concentration in Brown Rice to Develop Bio-fortified Rice Varieties. DOI: 10.5958/0976-1926.2022.00036.2.10 | |
| Phattarakul et al. 2012. Biofortification of rice grain with zinc through zinc fertilization in different countries. Plant Soil.361.DOI: 10.1007/s11104-012-1211-x | |
| Phuphong et al. 2018.Effects of Foliar Application of Zinc on Grain Yield and Zinc Concentration of Rice in Farmers’ Fields. Chiang Mai University Journal of Natural Sciences.17(3). DOI: 10.12982/CMUJNS.2018.0013 | |
| Pinson et al. 2015. Worldwide genetic diversity for mineral element concentrations in rice grain. Crop Science.55: 294-311. DOI: 10.2135/cropsci2013.10.0656 | |
| Pooniya & Shivay 2015. Influence of Green Manuring and Zinc Fertilization on Quality Parameters of Basmati Rice. Communications in Soil Science and Plant Analysis.46(3). DOI: 10.1080/00103624.2014.981275 | |
| Pooniya and Shivay 2013. Enrichment of basmati rice grain and straw with zinc and nitrogen through ferti-fortification and summer green manuring under Indo-Gangetic plains of India. Journal of Plant Nutrition.36:1, 91-117.DOI: 10.1080/01904167.2012.733052 | |
| Pooniya et al. 2012. Enhancing soil nutrient dynamics and productivity of Basmati rice through residue incorporation and zinc fertilization. European Journal of Agronomy.41.DOI: 10.1016/j.eja.2012.03.004 | |
| Pooniya et al. 2019. Zinc bio-fortification and kernel quality enhancement in elite Basmati rice (*Oryza sativa*) cultivars of south Asia through legume residue-recycling and zinc fertilization. Indian Journal of Agricultural Sciences .89(2). DOI: 10.56093/ijas.v89i2.87019 | |
| Prabhu et al. 2021. Influence of fortified in situ rice residue compost and zinc nano fertilizer on growth and yield of rice (*Oryza sativa* L.) under rice cultivation methods. Annals of Plant and Soil Research.23(3). DOI: 10.47815/apsr.2021.10072 | |
| Prajapat et al. 2022. Genetic diversity analysis through ssr markers for grain Fe and Zn content in aerobic rice. Asian Journal of Microbiology Biotechnology and Environmental Sciences 23(1). DOI: 10.53550/AJMBES.2022.v24i01.025 | |
| Prakash et al. 2018. Zinc Accounting for Lowland Rice (*Oryza sativa* L.) Under Different Methods of Zinc Application with Green Leaf Manuring. Advances in Crop Science and Technology.6(3). DOI: 10.4172/2329-8863.1000374 | |
| Prasad & Shivay. 2018. Relative grain zinc loading ability of cereals (rice, wheat, maize) and a grain legume (chickpea). Indian Journal of Agricultural Sciences.88(2). | |
| Prasad et al. 2002. Evaluating Zinc Fertilizer Requirement on Typic Haplaquent in the Rice-Wheat Cropping System. Journal of Sustainable Agriculture.19(3). DOI: 10.1300/J064v19n03_05 | |
| Prom-u-thai et al. 2016. Iron, zinc and total antioxidant capacity in different layers of rice grain among different varieties. International Journal of Agriculture & Biology.18(06). DOI: 10.17957/IJAB/15.0216 | |
| Prom-u-thai et al. 2020. Simultaneous biofortification of rice with zinc, iodine, iron and selenium through foliar treatment of a micronutrient cocktail in five countries. Frontiers in Plant Science.11. DOI: 10.3389/fpls.2020.589835 | |
| Rahim et al. 2023. Improving zinc and iron density and estimated human bioavailability in rice grain through fertilization. Arabian Journal of Geosciences.16. DOI: 10.1007/s12517-023-11303-6 | |
| Rahman et al. 2022. Mixed Nanocomposite Fertilizers Influencing Endophytic Symbiosis and Nutritional and Antioxidant Properties of *Oryza sativa* as a Sustainable Alternative for Commercial Fertilizers. ACS omega.7(8). DOI: 10.1021/acsomega.1c06395 | |
| Rajput et al. 2024. Agronomic biofortification of basmati rice (*Oryza sativa* L.) through iron and boron under varying seedling densities. Frontiers in Sustainable Food Systems.8.DOI: 10.3389/fsufs.2024.1388807 | |
| Rakotondramanana et al. 2024. Stability of grain zinc concentrations across lowland rice environments favors zinc biofortification breeding. Frontiers in Plant Science.15.DOI: 10.3389/fpls.2024.1293831 | |
| Ram et al. 2016. Biofortification of wheat, rice and common bean by applying foliar zinc fertilizer along with pesticides in seven countries.Plant and Soil.403. DOI: 10.1007/s11104-016-2815-3 | |
| Ramzani et al. 2016. Integrating the organic amendment with iron fertilization for improving productivity and fe biofortification in rice under acidified calcareous soil. Pakistan Journal of Agricultural Sciences.53(2). DOI: 10.21162/PAKJAS/16.5116 | |
| Rao et al. 2020. Zinc biofortified rice varieties: challenges, possibilities, and progress in India. Frontiers in Nutrition. 7: 26. DOI: 10.3389/fnut.2020.00026 | |
| Rashid et al. 2019. Effect of zinc-biofortified seeds on grain yield of wheat, rice, and common bean grown in six countries. Journal of Plant Nutrition and Soil Science.182(5). DOI: 10.1002/jpln.201800577 | |
| Rathod et al. 2020. Genetic studies for yield and nutritional traits in unpolished rice RILs of MTU1010 x BR2655.Indian J. Genet .80(3): 324-328.DOI: 10.31742/IJGPB.80.3.12 | |
| Raza et al. 2020. Grain Fe and Zn contents linked SSR markers based genetic diversity in rice. Plos One.15(9). DOI: 10.1371/journal.pone.0239739 | |
| Regar et al. 2022. Zinc Fertilization: Effects on Nutrients Availability and Productivity of Rice (*Oryza sativa* L.). International Journal of Plant & Soil Science.34(12). DOI: 10.9734/IJPSS/2022/v34i1230958 | |
| Rehman et al. 2018. Irrigation and Zn fertilizer management improves Zn phyto-availability in various rice production systems. Journal of Plant Nutrition and Soil Science.181(3). DOI: 10.1002/jpln.201700412 | |
| Reis et al. 2018. Agronomic biofortification of upland rice with selenium and nitrogen and its relation to grain quality. Journal of Cereal Science.79.DOI: 10.1016/j.jcs.2018.01.004 | |
| Rerkasem et al. 2015. Effect of polishing time on distribution of monomeric anthocyanin, iron and zinc content in different grain layers of four Thai purple rice varieties. International Journal of Agriculture & Biology.17: 828-832. DOI: 10.17957/IJAB/14.0012 | |
| Rose et al. 2016. Phosphorus deficiency alters nutrient accumulation patterns and grain nutritional quality in rice. Agronomy 6: 52. DOI: 10.3390/agronomy6040052 | |
| Rose. 2016.Polymer-Coated Urea Delays Growth and Accumulation of Key Nutrients in Aerobic Rice but Does Not Affect Grain Mineral Concentrations.Agronomy.6(9). DOI: 10.3390/agronomy6010009 | |
| Saha et al. 2015. Impact of zinc application methods on zinc concentration and zinc-use efficiency of popularly grown rice (*Oryza sativa*) cultivars. Indian Journal of Agronomy.60(3). DOI: 10.59797/ija.v60i3.4469 | |
| Saha et al. 2017. Agronomic biofortification of zinc in rice: Influence of cultivars and zinc application methods on grain yield and zinc bioavailability. Field Crops Research.210:52-60. DOI: 10.1016/j.fcr.2017.05.023 | |
| Saha et al. 2020. Zinc (Zn) application methods influences Zn and iron (Fe) bioavailability in brown rice. Cereal Research Communications.48. DOI: 10.1007/s42976-020-00038-9 | |
| Saikh et al. 2022. Effect of foliar zinc application on growth and yield of rice (*Oryza sativa*) in the Indo-Gangetic Plains of India. Nusantara Bioscience.14(2). DOI: 10.13057/nusbiosci/n140208 | |
| Sala M, CR A k, Geetha S, Gnanamalar RP, Hemalatha G (2013) Variability studies for iron and zinc content on segregating population of rice. Electronic J Plant Breed 4:1201–1204 | |
| Sala M et al. 2013. Variability studies for iron and zinc content on segregating population of rice. Electronic J Plant Breed 4:1201–1204 | |
| Saleque et al. 2001.Influences of phosphorus deficiency on the uptake of nitrogen, potassium, calcium, magnesium, sulfur, and zinc in lowland rice varieties. Journal of Plant Nutrition.24(10). DOI: 10.1081/PLN-100106025 | |
| Samak A. et al. 2011. Studies on genetic variability and genetic control for protein and micronutrient content in F4 and F5 generation of rice (*Oryza Sativa* L). Asian J Plant Sci 10:376–379 | |
| Sanghamitra et al. 2022. Characterization and exploring genetic potential of landraces from Odisha with special emphasis on grain micronutrient content for benefaction of biofortification in rice.Physiol Mol Biol Plants .28: 203–221.DOI: 10.1007/s12298-021-01119-7 | |
| Saudy et al. 2021. Co–application effect of herbicides and micronutrients on weeds and nutrient uptake in flooded irrigated rice: Does it have a synergistic or an antagonistic effect? Crop Protection.149.DOI: 10.1016/j.cropro.2021.105755 | |
| Senguttuvel P. 2023. Rice biofortification: breeding and genomic approaches for genetic enhancement of grain zinc and iron contents. Front. Plant Sci. 14:1138408. doi: 10.3389/fpls.2023.1138408. | |
| Sha et al. 2017. Variations in nutrient and trace element composition of rice in an organic rice-frog coculture system. Scientific Reports.7(1). DOI: 10.1038/s41598-017-15658-1 | |
| Shah et al. 2023. Enhancements in yield, agronomic, and zinc recovery efficiencies of rice-wheat system through bioactive zinc coated urea application in Aridisols. PlosOne.18(3). DOI: 10.1371/journal.pone.0282615 | |
| Shahane et al. 2019. Zinc nutrition of rice as influenced by crop establishment methods, rates of nitrogen and phosphorus fertilization and inoculation with microbial consortia. Journal of Plant Nutrition.42(16). DOI: 10.1080/01904167.2019.1636066 | |
| Shakeel et al. 2024. Zinc solubilizing bacteria synergize the effect of zinc sulfate on growth, yield and grain zinc content of rice (*Oryza sativa*). Cereal Research Communications 52: 961–971. DOI: 10.1007/s42976-023-00439-6 | |
| Sharma et al. 1982. Evaluation of levels and methods of zinc application to rice in sodic soils. Fertilizer Research.3.DOI: 10.1007/BF01082975 | |
| Sharma et al. 2013. Enhancing grain iron content of rice by the application of plant growth promoting rhizobacteria. Plant Soil Environment.59(2). DOI: 10.17221/683/2012-PSE | |
| Sharma et al. 2015. Evaluation of different PGPR strains for yield enhancement and higher Zn content in different genotypes of rice (*Oryza sativa* l.). DOI: 10.1080/01904167.2014.934475 | |
| Shaygany et al. 2012. Increased yield of direct seeded rice (*Oryza sativa* L.) by foliar fertilization through multi-component fertilizers. Archives of Agronomy and Soil Science.58(10). DOI: 10.1080/03650340.2011.570336 | |
| Sheikhnazari et al. 2023. Integrated Application of Rice Husk Biochar and ZnO-NPs Improves Yield Components, Yield and Nutrient Uptake in Grain of Rice Under Different Nitrogen Fertilizer Levels. Gesunde Pflanzen .75.DOI: 10.1007/s10343-022-00691-6 | |
| Shen et al. 2023. Zinc localization and speciation in rice grain under variable soil zinc deficiency. Plant Soil .491:605–626.DOI: 10.1007/s11104-023-06140-1 | |
| Shi et al. 2020. Using sowing date management to promote micronutrient quality and alleviate cadmium accumulation in rice grains. Cereal Research Communications.48. DOI: 10.1007/s42976-020-00094-1 | |
| Shivay & Prasad. 2012. Zinc-coated urea improves productivity and quality of basmati rice (*Oryza sativa* l.) under zinc stress condition. Journal of Plant Nutrition.35(6). DOI: 10.1080/01904167.2012.663444 | |
| Shivay et al. 2008a. Relative yield and zinc uptake by rice from zinc sulphate and zinc oxide coatings onto urea. Nutrient Cycling in Agroecosystems.80. DOI: 10.1007/s10705-007-9131-5 | |
| Shivay et al. 2008b. Effect of zinc-enriched urea on productivity, zinc uptake and efficiency of an aromatic rice–wheat cropping system. Nutrient Cycling in Agroecosystems.81. DOI: 10.1007/s10705-007-9159-6 | |
| Shivay et al. 2010. Genotypic variation for productivity, zinc utilization efficiencies, and kernel quality in aromatic rice under low available zinc conditions. Journal of Plant Nutrition.33(12). DOI: 10.1080/01904167.2010.503832 | |
| Shivay et al. 2014. Effect of Conditioning zinc sulfate heptahydrate (ZnSHH) with Zinc Oxide (ZnO) and neem oil on growth, productivity, zinc biofortification of grain and zinc uptake by basmati rice. Journal of Plant Nutrition.37: 1873-1884. DOI: 10.1080/01904167.2014.911887 | |
| Shivay et al. 2022. Cyanobacterial inoculation enhances nutrient use efficiency and grain quality of basmati rice in the system of rice intensification. ACS Agricultural Science & Technology.2 (4): 742–753.DOI: 10.1021/acsagscitech.2c00030 | |
| Siddika et al. 2016. Effect of different micronutrients on growth and yield of rice. International Journal of Plant & Soil Science.12(6). DOI: 10.9734/IJPSS/2016/28707 | |
| Singh et al. 2016. Effect of summer green manuring crops and zinc fertilizer sources on productivity, Zn-uptake and economics of basmati rice. Journal of Plant Nutrition.39(2). DOI: 10.1080/01904167.2015.1009108 | |
| Singh et al. 2023. Effect of foliar application of nutrients on yield and nutrient uptake by rice crop. International Journal of Environment and Climate Change.13(11). DOI: 10.9734/ijecc/2023/v13i113188 | |
| Slaton et al. 2001. Evaluation of zinc seed treatments for rice. Agronomy Journal.93(1). DOI: 10.2134/agronj2001.931152x | |
| Slaton et al. 2005. Effect of zinc source and application time on zinc uptake and grain yield of flood-irrigated rice. Agronomy Journal 97(1). DOI: 10.2134/agronj2005.0272 | |
| Soltani et al. 2016. Rice growth improvement and grains bio-fortification through lime and zinc application in zinc deficit tropical acid sulphate soils. Chemical Speciation & Bioavailability.28(1-4). DOI: 10.1080/09542299.2016.1198989 | |
| Sperotto et al. 2013. Rice grain Fe, Mn and Zn accumulation: How important are flag leaves and seed number? Plant Soil Environment.59(6). DOI: 10.17221/841/2012-PSE | |
| Srivastava et al. 2009. Comparative study of a Zn-enriched post-methanation bio-sludge and Zn sulfate as Zn sources for a rice-wheat crop rotation. Nutrient Cycling in Agroecosystems.85. DOI: 10.1007/s10705-009-9258-7 | |
| Srivastava et al. 2014. Effect of zinc application methods on apparent utilization efficiency of zinc and phosphorus fertilizers under basmati rice-wheat rotation. Archives of Agronomy and Soil Science.60(1). DOI: 10.1080/03650340.2013.770145 | |
| Srivastava et al. 2015. Effect of zinc application methods on apparent utilization efficiency of zinc and potassium fertilizers under rice-wheat rotation. Journal Of Plant Nutrition.39. DOI: 10.1080/01904167.2015.1016170 | |
| Stalin et al. 2015. Effect of newly developed zinc chelates on productivity and quality of rice. Advances in Applied Research 6(2). DOI: 10.5958/2349-2104.2014.00006.0 | |
| Su et al. 2018. Different phosphorus supplies altered 1 the accumulations and quantitative distributions of phytic acid, zinc and iron in rice (*Oryza sativa* L.) grains. Journal of Agricultural and Food Chemistry.66(7):1601-1611.doi: 10.1021/acs.jafc.7b04883 | |
| Sultana et al. 2021. Nutrient Enriched Municipal Solid Waste Compost Increases Yield, Nutrient Content and Balance in Rice.Sustainability.13(1047). DOI: 10.3390/su13031047 | |
| Suman et al. 2021. Identification of promising rils for high grain zinc through genotype _ environment analysis and stable grain zinc QTL Using SSRs and SNPs in Rice (*Oryza sativa* L.). Front. Plant Sci. .12:587482.doi: 10.3389/fpls.2021.587482 | |
| Susanto U 2008. Mapping of quantitative trait loci for high iron and zinc content in polished rice (*Oryza sativa* L) grain and some agronomic traits using simple sequence repeats markers, Phd Thesis Submitted to Bogor Agricultural Univesrity Bogor Indonesia | |
| Susanto et al. 2017. Yield and Zn content of biofortified rice genotypes in an Indonesian rice agro-ecosystem. Nusantara Bioscience.9(3). DOI: 10.13057/nusbiosci/n090308 | |
| Swamy BPM et al. 2016. Advances in breeding for high grain Zinc in Rice. *Rice* **9**, 49. DOI: 10.1186/s12284-016-0122-5 | |
| Tandon 1996. Effect of zinc and iron supply on production potential of rice (*Oryza sativa* L). J. Agron. Crop Sci. 176: 213-216. DOI: 10.1111/j.1439-037X.1996.tb00465.x | |
| Tiwari et al. 1982. Effect of sedimentary pyrites and Zn application on yield, Zn and Ca nutrition of rice and wheat crops and on amelioration of saline sodic soil. The Journal of Agricultural Science.99. DOI: 10.1017/S0021859600030203 | |
| Thongbam PD et al. 2012. Studies on grain and food quality traits of some indigenous rice cultivars of North-eastern Hill Region of India. J Agric Sci 4:3 | |
| Tripathi et al. 2018. Effect of nutrients management practices on yield, nutrients uptake and quality characteristics of rice (*Oryza sativa* L.) in central alluvial tract of Uttar Pradesh. Annals of Plant and Soil Research .20: S39 – S44 .NA | |
| Tuyogon et al. 2016. Enriching rice grain zinc through zinc fertilization and water management. Soil Sci. Soc. Am. J. .80:121–134.doi:10.2136/sssaj2015.07.0262 | |
| Tyagi et al. 2018. Modulation of phytic acid and phytic acid-zinc molar ratio by different modes of zinc application in rice. Ind J Plant Physiol. 23: 529–535. DOI: 10.1007/s40502-018-0399-z | |
| Ugile et al. 2024. Soil and Foliar Application of Zn and Fe Impact on Growth, Grain Yield and Seed Quality of Rice (*Oryza sativa* L.). Asian Journal of Soil Science and Plant Nutrition 10(2). DOI: 10.9734/AJSSPN/2024/v10i226 | |
| Ullah et al. 2017. Manganese nutrition improves the productivity and grain biofortification of fine grain aromatic rice in conventional and conservation production systems. Paddy Water Environ 15: 563–572. DOI 10.1007/s10333-016-0573-8 | |
| Ullah, M.Z., Biswas, P., Islam, M.S. (2023) Genetic Analysis of Agronomic Traits and Grain Anthocyanin and Micronutrient (Zinc and Iron) Content in Rice (*Oryza sativa* L.). Trends Agric. Sci. 2(3): 288-297, 2023 DOI: 10.17311/tas.2023.288.297. | |
| Vaid et al. 2020.Effective zinc mobilization to rice grains using rhizobacterial consortium. Israel Journal of Plant Sciences.67(3–4). DOI: 10.1163/22238980-20201085 | |
| Vandamme et al. 2016. Genotypic Variation in Grain P Loading across Diverse Rice Growing Environments and Implications for Field P Balances. Front. Plant Sci. 7: 1435. DOI: 10.3389/fpls.2016.01435 | |
| Vasu et al. 2024. Influence of zinc and boron on growth and yield of rice. International Journal of Environment and Climate Change.14(2). DOI: 10.9734/ijecc/2024/v14i23992 | |
| Veni et al. 2019. Effect of variability of zinc on enhancement of zinc density in basmati rice grain grown in three different soils in India. Journal of Plant Nutrition. DOI: 10.1080/01904167.2019.1701024 | |
| Verma et al. 2022. Yield and zinc accumulation response of basmati rice to incremental zinc fertilisation of a zinc-deficient soil. Crop & Pasture Science 73: 842-849. DOI: 10.1071/CP21391 | |
| Vijayakumar et al. 2023. Enriching cationic micro-nutrients concentration in basmati rice through potassium fertilization. Journal Of Plant Nutrition 46: 3355–3369. DOI: 10.1080/01904167.2023.2203183 | |
| Wang et al. 2009. Growth responses to varying zinc activities in rice genotypes differing in Zn efficiency and Zn density. Journal Of Plant Nutrition 32: 681–693. DOI: 10.1080/01904160902734950 | |
| Wang et al. 2018. Foliar application of Zn can reduce Cd concentrations in rice (*Oryza sativa* L.) under field conditions. Environmental Science and Pollution Research .25:29287–29294.DOI: 10.1007/s11356-018-2938-6 | |
| Wang et al. 2020. Foliar Application of Zn-EDTA at Early Filling Stage to Increase Grain Zn and Fe, and Reduce Grain Cd, Pb and Grain Yield in Rice (*Oryza sativa* L.). Bulletin of Environmental Contamination and Toxicology.105:428–432.DOI: 10.1007/s00128-020-02949-z | |
| Wang et al. 2023. Zinc Oxide Nanoparticles Foliar Application Effectively Enhanced Zinc and Aroma Content in Rice (*Oryza sativa* L.) Grains.Rice.36.DOI: 10.1186/s12284-023-00653-0 | |
| Wei et al. 2012. Biofortification and bioavailability of rice grain zinc as affected by different forms of foliar zinc fertilization. PLOS ONE .7(9). DOI: 10.1371/journal.pone.0045428 | |
| Wissuwa et al. 2008. Rice grain zinc concentrations as affected by genotype, native soil-zinc availability, and zinc fertilization. Plant Soil .306:37–48.DOI 10.1007/s11104-007-9368-4 | |
| Xiong et al. 2023. Effects of SeNPs Fertilizer on Se and Microelement Contents, Eating and Cooking Qualities, and Volatile Organic Compounds in Rice Grains.Sustainability.15. DOI: 10.3390/su151310553 | |
| Yin et al. 2016. Zinc concentration in rice (*Oryza sativa* l.) grains and allocation in plants as affected by different zinc fertilization strategies. Communications In Soil Science and Plant Analysis.47(6). DOI: 10.1080/00103624.2016.1146891 | |
| Yogi et al. 2023. Foliar zinc fertilization improves yield, biofortification and nutrient-use efficiency of upland rice. Nutrient Cycling in Agroecosystems.125.DOI: 10.1007/s10705-023-10270-4 | |
| Yuan et al. 2017. Coated urea enhances iron and zinc concentrations in rice grain under different cultivation methods...DOI: 10.1080/01904167.2016.1250907 | |
| Zeng et al. 2010. Genotypic variation in element concentrations in brown rice from Yunnan landraces in China. Environmental Geochemistry and Health.32. DOI: 10.1007/s10653-009-9272-3 | |
| Zhang MW, Guo BJ, Peng ZM 2004. Genetic effects on Fe Zn Mn and P contents in Indica black pericarp rice and their genetic correlations with grain characteristics. Euphytica 135:315–323 | |
| Yu YH, Li G, Fan YY, Zhang KQ, Min J, Zhu ZW, Zhuang JY. 2009. Genetic relationship between grain yield and the contents of protein and fat in a recombinant inbred population of rice. J Cereal Sci. 50(1):121–5. | |
| Zhao et al. 2011. Genomewide association mapping reveals a rich genetic architecture of complex traits in *Oryza sativa*. Nature Communication. 2: 467. DOI: 10.1038/ncomms1467 | |
| Zhen et al. 2021. Foliar application of Zn reduces Cd accumulation in grains of late rice by regulating the antioxidant system, enhancing Cd chelation onto cell wall of leaves, and inhibiting Cd translocation in rice. .Sci Total Environ. 770:145302. .doi: 10.1016/j.scitotenv.2021.145302 | |
| Zulfiqar et al. 2020.Zinc nutrition to enhance rice productivity, zinc use efficiency, and grain biofortification under different production systems. Crop Science.61(1). DOI: 10.1002/csc2.20381 | |
| Zulfiqar et al. 2021. Enhancing the accumulation and bioavailability of iron in rice grains via agronomic interventions. Crop & Pasture Science.61(1). DOI: 10.1071/CP21140 | |
| Zulfiqar et al. 2023. Genetic diversity studies for grain iron and zinc content analysis for Elite rice (*Oryza sativa* L.) genotype by using SSR markers. Journal of Food Composition and Analysis 115: 104816. DOI: 10.1016/j.jfca.2022.104816 | |

## Table S2. Comparison of brown rice with white rice in terms of mineral, protein, and phytate concentrations

Table S2. Comparison of brown rice with white rice in terms of mineral, protein, and phytate concentrations using the 95% confidence intervals (CI) of medians, the Mann-Whitney test of equality of medians (*P* values), and the % change in median concentrations due to conversion from brown to white rice

| Seed mineral concentrations | Sample sizes  [Brown; White] | Brown rice  Median (95% CI)† | White rice  Median (95% CI)† | *P* value | % change in median conc. |
| --- | --- | --- | --- | --- | --- |
| Zn (mg kg-1) | [8018; 1475] | 25.37 (25.20 ‒ 25.54) | 17.52 (17.04 ‒ 18.00) | *<0.001* | -30.9 |
| Fe (mg kg-1) | [5725; 914] | 11.72 (11.65 ‒ 11.80) | 3.60 (3.43 ‒ 3.81) | *<0.001* | -69.3 |
| Protein (%) | [1352; 259] | 8.03 (7.95 ‒ 8.11) | 8.60 (8.33 ‒ 9.00) | *<0.001* | 7.1 |
| Phytate (%) | [568; 239] | 0.92 (0.84 ‒ 1.01) | 0.38 (0.37 ‒ 0.39) | *<0.001* | -59.3 |
| P (%) | [5074; 175] | 0.35 (0.35 ‒ 0.35) | 0.13 (0.12 ‒ 0.16) | *<0.001* | -63.5 |
| S (%) | [3846; 42] | 0.127 (0.127 ‒ 0.129) | 0.105 (0.097 ‒ 0.115) | *<0.001* | -17.7 |

† CI represents the 95% confidence interval of the median.

## Table S3. Correlations between traits

Table S3a. Overall estimates of Pearson correlation coefficients (and their lower and upper 95% confidence intervals) for the bivariate correlation between grain Zn uptake, grain Fe uptake, grain N uptake, grain yield, and concentrations of Zn, Fe, protein, and phytate in rice grain estimated from all studies regardless of the study type

| Correlations [s] | Correlation coefficient (95% CI) | Two tailed *P* value | Verdict |
| --- | --- | --- | --- |
| Grain Zn uptake vs grain Fe uptake [853] | 0.688 (0.652 ‒ 0.723) | *0.0000* | Significantly positive |
| Grain Zn uptake vs grain N uptake [672] | 0.714 (0.677 ‒ 0.751) | *0.0000* | Significantly positive |
| Grain N uptake vs grain Fe uptake [204] | 0.301 (0.175 ‒ 0.427) | *0.0000* | Significantly positive |
| Grain yield vs grain Zn concentration [2657] | 0.091 (0.054 ‒ 0.129) | *0.0000* | Significantly positive |
| Grain yield vs grain Fe concentration [987] | 0.198 (0.137 ‒ 0.258) | *0.0000* | Significantly positive |
| Grain yield vs grain protein concentration [832] | 0.002 (-0.067 ‒ 0.070) | *0.9688* | Non significant |
| Grain yield vs grain phytate concentration [351] | -0.067 (-0.171 ‒ 0.038) | *0.2131* | Non significant |
| Grain Zn vs grain Fe concentration [6848] | 0.418 (0.398 ‒ 0.437) | *0.0000* | Significantly positive |
| Grain Zn vs grain protein concentration [919] | 0.179 (0.116 ‒ 0.242) | *0.0000* | Significantly positive |
| Grain Zn vs grain phytate concentration [827] | -0.069 (-0.137 ‒ -0.001) | *0.0462* | Significantly negative |
| Grain Fe vs grain protein concentration [535] | 0.097 (0.012 ‒ 0.181) | *0.0245* | Significantly positive |
| Grain Fe vs grain phytate concentration [502] | 0.371 (0.296 ‒ 0.447) | *0.0000* | Significantly positive |
| Grain protein vs grain phytate [123] | 0.268 (0.102 ‒ 0.434) | *0.0016* | Significantly positive |

A correlation coefficient is deemed significantly different from zero if the 95% CIs does not encompass 0 and the two-tailed P value is <0.05. The “s” represents the total number of observations used for each bivariate correlation.

Table S3b. Random effects meta-analysis of correlations between grain yield, and concentrations of Zn, Fe, protein, and phytate in rice grain. The random effects meta-analysis was carried out using the Fisher r-to-z transformation of the correlation coefficient as the outcome measure. The amount of heterogeneity is indicated by the *T*2, *I*2, *H*2, and P value of Cochran’s Q statistic. The individual studies upon which this meta-analysis was based have been summarized in Table S3c.

|  |  | Test of heterogeneity | | | |  | Test of publication bias | |
| --- | --- | --- | --- | --- | --- | --- | --- | --- |
| Correlations [n] | Coefficient (95% CI) | *T*2 | *I*2 (%) | *H*2 | P>Q |  | Fail-safe N | Trim and fill |
| Studies on germplasm |  |  |  |  |  |  |  |  |
| Grain yield vs grain Zn [13] | -0.041 (-0.342; 0.260) | 0.25 | 92.0 | 12.5 | <0.001 |  | 0 | 3.0 |
| Grain yield vs grain Fe [8] | 0.041 (-0.147; 0.229) | 0.03 | 48.7 | 1.9 | 0.062 |  | 0 | 0 |
| Grain yield vs grain protein [3] | 0.040 (-1.53; 1.60) | 1.79 | 93.7 | 15.8 | <0.001 |  | 0 | 0 |
| Grain Zn vs grain Fe [34] | **0.368 (0.219; 0.616)** | 0.15 | 94.6 | 18.6 | <0.001 |  | 2721*** | 6.0 |
| Grain Zn vs grain protein [6] | 0.415 (-0.065; 0.895) | 0.27 | 78.4 | 4.6 | <0.001 |  | 28 | 0 |
| Grain Zn vs grain phytate [6] | 0.291 (0.003; 0.579) | 0.09 | 72.1 | 3.6 | <0.001 |  | 24 | 0 |
| Grain Fe vs grain protein [6] | 0.263 (-0.165; 0.690) | 0.19 | 71.4 | 3.5 | 0.014 |  | 8 | 1 |
| Grain Fe vs grain phytate [5] | 0.305 (-0.079; 0.689) | 0.14 | 79.5 | 4.9 | <0.001 |  | 28 | 1 |
| Studies on fertilization |  |  |  |  |  |  |  |  |
| Grain yield vs grain Zn [67] | **0.637 (0.473; 0.801)** | 0.40 | 89.7 | 9.7 | <0.001 |  | 10460*** | 12 |
| Grain yield vs grain Fe [23] | **0.763 (0.479; 1.046)** | 0.41 | 89.6 | 9.6 | <0.001 |  | 1617*** | 0 |
| Grain yield vs grain protein [32] | **0.952 (0.652; 1.251)** | 0.67 | 92.0 | 12.5 | <0.001 |  | 4712*** | 3 |
| Grain yield vs grain phytate [8] | **-0.455 (-0.873; -0.037)** | 0.32 | 91.6 | 11.9 | <0.001 |  | 100*** | 0 |
| Grain Zn vs grain Fe [26] | **0.718 (0.430; 1.006)** | 0.49 | 91.4 | 11.6 | <0.001 |  | 1800*** | 0 |
| Grain Zn vs grain protein [33] | **0.868 (0.652; 1.084)** | 0.32 | 84.1 | 6.3 | <0.001 |  | 4348*** | 0 |
| Grain Zn vs grain phytate [11] | 0.066 (-0.352; 0.484) | 0.45 | 94.2 | 17.1 | <0.001 |  | 8 | 0 |
| Grain Fe vs grain protein [16] | **0.883 (0.569; 1.197)** | 0.33 | 84.4 | 6.4 | <0.001 |  | 998*** | 0 |
| Grain Fe vs grain phytate [6] | -0.374 (-1.402; 0.655) | 1.58 | 96.9 | 32.6 | <0.001 |  | 15 | 0 |
| Grain protein vs phytate [4] | -0.860 (-2.15; 0.428) | 1.63 | 94.3 | 17.6 | <0.001 |  | 38 | 0 |

[n] represents the number of studies. Zn, Fe, protein and phytate represent concentrations in rice grain. Values in boldface represent statistically significant correlations.

Table S3c. Pearson correlation coefficients between grain yield, and concentrations of Zn, Fe, protein, and phytate in rice grain estimated for individual studies that had 10 or more means on either germplasm or fertilization

| Study type | Correlations | Study (refer to Table S1 for details) | Number of observations | Correlation coefficient | Lower CI | Upper CI | Two-tailed *P* value |
| --- | --- | --- | --- | --- | --- | --- | --- |
| Germplasm | Grain vs Zn | Shi et al. 2020 | 14 | 0.616 | 0.25 | 0.983 | *0.0010* |
|  | Grain vs Zn | Gogoi et al. 2016 | 15 | 0.563 | 0.176 | 0.949 | *0.0044* |
|  | Grain vs Zn | Tuyogon et al. 2016 | 10 | 0.534 | 0.004 | 1.064 | *0.0477* |
|  | Grain vs Zn | Izhar et al. 2024 | 11 | 0.373 | -0.224 | 0.97 | *0.2225* |
|  | Grain vs Zn | Sharma et al. 2015 | 54 | 0.265 | 0.009 | 0.52 | *0.0418* |
|  | Grain vs Zn | Goloran et al. 2019 | 24 | 0.032 | -0.395 | 0.459 | *0.8924* |
|  | Grain vs Zn | Padhan et al. 2020 | 204 | -0.012 | -0.15 | 0.126 | *0.8767* |
|  | Grain vs Zn | Shivay et al. 2010 | 27 | -0.144 | -0.536 | 0.248 | *0.4807* |
|  | Grain vs Zn | Rakotondramanana et al. 2024 | 231 | -0.177 | -0.303 | -0.051 | *0.0058* |
|  | Grain vs Zn | Naik et al. 2020 | 82 | -0.192 | -0.405 | 0.02 | *0.0755* |
|  | Grain vs Zn | El-Sobky et al. 2022 | 12 | -0.279 | -0.882 | 0.323 | *0.3694* |
|  | Grain vs Zn | Jaksomsak et al. 2021 | 42 | -0.521 | -0.75 | -0.292 | *0.0000* |
|  | Grain vs Zn | Laenoi et al. 2018 | 12 | -0.928 | -1.019 | -0.837 | *0.0000* |
|  | Grain vs Fe | Shi et al. 2020 | 14 | 0.659 | 0.325 | 0.993 | *0.0001* |
|  | Grain vs Fe | Izhar et al. 2024 | 11 | 0.598 | 0.152 | 1.043 | *0.0085* |
|  | Grain vs Fe | Zulfiqar et al. 2023 | 14 | 0.061 | -0.528 | 0.65 | *0.8498* |
|  | Grain vs Fe | Naik et al. 2020 | 82 | 0.02 | -0.2 | 0.241 | *0.8661* |
|  | Grain vs Fe | Padhan et al. 2020 | 204 | -0.032 | -0.17 | 0.106 | *0.6606* |
|  | Grain vs Fe | Laenoi et al. 2018 | 12 | -0.205 | -0.831 | 0.421 | *0.5323* |
|  | Grain vs Fe | Jaksomsak et al. 2021 | 42 | -0.209 | -0.509 | 0.091 | *0.1729* |
|  | Grain vs Fe | Baruah et al. 2006 | 10 | -0.216 | -0.922 | 0.49 | *0.5599* |
|  | Grain vs protein | El-Sobky et al. 2022 | 12 | 0.913 | 0.805 | 1.022 | *0.0000* |
|  | Grain vs protein | Baruah et al. 2006 | 10 | -0.295 | -0.971 | 0.381 | *0.3999* |
|  | Grain vs protein | Laenoi et al. 2018 | 12 | -0.815 | -1.034 | -0.595 | *0.0000* |
|  | Zn vs Fe | Shi et al. 2020 | 14 | 0.939 | 0.87 | 1.009 | *0.0000* |
|  | Zn vs Fe | Kumar et al. 2017a | 12 | 0.859 | 0.687 | 1.03 | *0.0000* |
|  | Zn vs Fe | Al-Daej 2022 | 10 | 0.819 | 0.576 | 1.063 | *0.0000* |
|  | Zn vs Fe | Nath et al. 2022 | 10 | 0.733 | 0.389 | 1.076 | *0.0000* |
|  | Zn vs Fe | Li et al. 2015 | 30 | 0.721 | 0.539 | 0.902 | *0.0000* |
|  | Zn vs Fe | Anandan et al. 2011 | 10 | 0.667 | 0.257 | 1.078 | *0.0015* |
|  | Zn vs Fe | Izhar et al. 2024 | 11 | 0.648 | 0.246 | 1.05 | *0.0016* |
|  | Zn vs Fe | Laenoi et al. 2018 | 24 | 0.611 | 0.343 | 0.879 | *0.0000* |
|  | Zn vs Fe | Maganti et al. 2019 | 472 | 0.587 | 0.527 | 0.646 | *0.0000* |
|  | Zn vs Fe | Suman et al. 2021 | 368 | 0.578 | 0.509 | 0.646 | *0.0000* |
|  | Zn vs Fe | Veni et al. 2019 | 10 | 0.565 | 0.061 | 1.069 | *0.0278* |
|  | Zn vs Fe | Joy et al. 2017 | 54 | 0.55 | 0.358 | 0.741 | *0.0000* |
|  | Zn vs Fe | Rathod et al. 2020 | 16 | 0.549 | 0.17 | 0.929 | *0.0046* |
|  | Zn vs Fe | Longvah et al. 2021 | 41 | 0.521 | 0.289 | 0.753 | *0.0000* |
|  | Zn vs Fe | Shen et al. 2023 | 19 | 0.42 | 0.016 | 0.823 | *0.0414* |
|  | Zn vs Fe | Madhubabu et al 2020 | 155 | 0.411 | 0.278 | 0.543 | *0.0000* |
|  | Zn vs Fe | Zeng et al. 2010 | 12 | 0.407 | -0.139 | 0.952 | *0.1444* |
|  | Zn vs Fe | Moulick et al. 2022 | 56 | 0.257 | 0.005 | 0.508 | *0.0451* |
|  | Zn vs Fe | Liang et al.2007 | 11 | 0.223 | -0.435 | 0.882 | *0.5166* |
|  | Zn vs Fe | Jaksomsak et al. 2021 | 44 | 0.218 | -0.074 | 0.509 | *0.1441* |
|  | Zn vs Fe | Prajapat et al. 2022 | 94 | 0.211 | 0.014 | 0.407 | *0.0353* |
|  | Zn vs Fe | Padhan et al. 2020 | 204 | 0.199 | 0.066 | 0.332 | *0.0034* |
|  | Zn vs Fe | Naik et al. 2020 | 82 | 0.182 | -0.031 | 0.395 | *0.0938* |
|  | Zn vs Fe | Parte et al. 2023 | 174 | 0.167 | 0.022 | 0.313 | *0.0243* |
|  | Zn vs Fe | Abera et al. 2021 | 12 | 0.116 | -0.529 | 0.76 | *0.7376* |
|  | Zn vs Fe | Li et al. 2012 | 32 | 0.115 | -0.244 | 0.474 | *0.5409* |
|  | Zn vs Fe | Sanghamitra et al. 2022 | 293 | 0.095 | -0.019 | 0.209 | *0.1027* |
|  | Zn vs Fe | Raza et al. 2020 | 112 | 0.078 | -0.108 | 0.265 | *0.4197* |
|  | Zn vs Fe | Pinson et al. 2015 | 3416 | 0.049 | 0.016 | 0.083 | *0.0039* |
|  | Zn vs Fe | Huang et al. 2016 | 40 | 0.044 | -0.277 | 0.366 | *0.7998* |
|  | Zn vs Fe | Liu et al. 2017 | 14 | -0.011 | -0.602 | 0.579 | *0.9727* |
|  | Zn vs Fe | Kummsa et al. 2022 | 44 | -0.184 | -0.48 | 0.111 | *0.2236* |
|  | Zn vs Fe | Kumar et al. 2023 | 67 | -0.404 | -0.609 | -0.199 | *0.0001* |
|  | Zn vs Fe | Gogoi et al. 2024 | 30 | -0.554 | -0.815 | -0.293 | *0.0000* |
|  | Zn vs protein | Al-Daej 2022 | 10 | 0.851 | 0.647 | 1.055 | *0.0000* |
|  | Zn vs protein | Laenoi et al. 2018 | 24 | 0.788 | 0.625 | 0.95 | *0.0000* |
|  | Zn vs protein | Longvah et al. 2021 | 41 | 0.284 | -0.009 | 0.576 | *0.0569* |
|  | Zn vs protein | Abera et al. 2021 | 12 | 0.2 | -0.427 | 0.827 | *0.5423* |
|  | Zn vs protein | Nath et al. 2022 | 10 | -0.201 | -0.912 | 0.511 | *0.5925* |
|  | Zn vs protein | El-Sobky et al. 2022 | 12 | -0.201 | -0.828 | 0.426 | *0.5416* |
|  | Fe vs phytate | Joy et al. 2017 | 53 | 0.714 | 0.578 | 0.85 | *0.0000* |
|  | Fe vs phytate | Kumar et al. 2023 | 67 | 0.384 | 0.175 | 0.593 | *0.0003* |
|  | Fe vs phytate | Kumar et al. 2017a | 12 | 0.07 | -0.58 | 0.72 | *0.8433* |
|  | Fe vs phytate | Li et al. 2015 | 30 | 0.028 | -0.349 | 0.404 | *0.8949* |
|  | Fe vs phytate | Liang et al.2007 | 11 | -0.175 | -0.847 | 0.497 | *0.6226* |
|  | Fe vs protein | Al-Daej 2022 | 10 | 0.885 | 0.724 | 1.046 | *0.0000* |
|  | Fe vs protein | Longvah et al. 2021 | 41 | 0.407 | 0.142 | 0.673 | *0.0027* |
|  | Fe vs protein | Laenoi et al. 2018 | 24 | 0.171 | -0.244 | 0.586 | *0.4269* |
|  | Fe vs protein | Abera et al. 2021 | 12 | 0.008 | -0.646 | 0.661 | *0.9836* |
|  | Fe vs protein | Nath et al. 2022 | 10 | -0.168 | -0.888 | 0.552 | *0.6599* |
|  | Fe vs protein | Baruah et al. 2006 | 10 | -0.285 | -0.966 | 0.396 | *0.4199* |
|  | Zn vs phytate | Liang et al.2007 | 11 | 0.721 | 0.389 | 1.054 | *0.0000* |
|  | Zn vs phytate | Joy et al. 2017 | 53 | 0.573 | 0.386 | 0.759 | *0.0000* |
|  | Zn vs phytate | Longvah et al. 2021 | 41 | 0.24 | -0.06 | 0.54 | *0.1162* |
|  | Zn vs phytate | Kumar et al. 2017a | 12 | 0.234 | -0.383 | 0.852 | *0.4663* |
|  | Zn vs phytate | Li et al. 2015 | 30 | 0.043 | -0.334 | 0.419 | *0.8345* |
|  | Zn vs phytate | Kumar et al. 2023 | 67 | -0.079 | -0.322 | 0.165 | *0.5373* |
|  | Protein vs phytate | Longvah et al. 2021 | 41 | 0.391 | 0.121 | 0.66 | *0.0046* |
| Fertilization | Grain vs Zn | Bana et al. 2022 | 11 | 0.968 | 0.924 | 1.012 | *0.0000* |
|  | Grain vs Zn | Shivay et al. 2008a | 19 | 0.954 | 0.91 | 0.998 | *0.0000* |
|  | Grain vs Zn | Vijayakumar et al. 2023 | 24 | 0.954 | 0.915 | 0.992 | *0.0000* |
|  | Grain vs Zn | Singh et al. 2023 | 20 | 0.951 | 0.905 | 0.996 | *0.0000* |
|  | Grain vs Zn | Kheyri et al. 2018 | 16 | 0.946 | 0.889 | 1.003 | *0.0000* |
|  | Grain vs Zn | Shivay & Prasad. 2012 | 22 | 0.939 | 0.885 | 0.992 | *0.0000* |
|  | Grain vs Zn | Karak et al. 2005 | 14 | 0.937 | 0.864 | 1.009 | *0.0000* |
|  | Grain vs Zn | Wang et al. 2023 | 12 | 0.93 | 0.841 | 1.018 | *0.0000* |
|  | Grain vs Zn | Mehta et al. 2023 | 12 | 0.896 | 0.767 | 1.025 | *0.0000* |
|  | Grain vs Zn | Srivastava et al. 2015 | 12 | 0.875 | 0.722 | 1.028 | *0.0000* |
|  | Grain vs Zn | Pooniya and Shivay 2013 | 24 | 0.867 | 0.76 | 0.973 | *0.0000* |
|  | Grain vs Zn | Mi et al. 2023 | 12 | 0.859 | 0.689 | 1.03 | *0.0000* |
|  | Grain vs Zn | Kumar et al. 2020 | 14 | 0.856 | 0.697 | 1.014 | *0.0000* |
|  | Grain vs Zn | Laik et al. 2019 | 13 | 0.853 | 0.685 | 1.022 | *0.0000* |
|  | Grain vs Zn | Jat et al. 2011 | 14 | 0.839 | 0.664 | 1.014 | *0.0000* |
|  | Grain vs Zn | Shivay et al. 2022 | 10 | 0.819 | 0.576 | 1.063 | *0.0000* |
|  | Grain vs Zn | Baral et al. 2023 | 12 | 0.811 | 0.587 | 1.035 | *0.0000* |
|  | Grain vs Zn | Chandra et al. 2023 | 29 | 0.803 | 0.666 | 0.939 | *0.0000* |
|  | Grain vs Zn | Fahad et al. 2015 | 50 | 0.767 | 0.65 | 0.885 | *0.0000* |
|  | Grain vs Zn | Hossain et al. 2008 | 54 | 0.767 | 0.653 | 0.88 | *0.0000* |
|  | Grain vs Zn | Srivastava et al. 2014 | 12 | 0.758 | 0.479 | 1.036 | *0.0000* |
|  | Grain vs Zn | Muthumanickam et al. 2022 | 18 | 0.751 | 0.531 | 0.972 | *0.0000* |
|  | Grain vs Zn | Ali et al. 2021 | 18 | 0.736 | 0.504 | 0.968 | *0.0000* |
|  | Grain vs Zn | Dass et al. 2017 | 11 | 0.726 | 0.398 | 1.054 | *0.0000* |
|  | Grain vs Zn | Elekhtyar et al. 2023 | 24 | 0.706 | 0.491 | 0.92 | *0.0000* |
|  | Grain vs Zn | Singh et al. 2016 | 12 | 0.684 | 0.337 | 1.032 | *0.0001* |
|  | Grain vs Zn | Fu et al. 2010 | 18 | 0.662 | 0.378 | 0.946 | *0.0000* |
|  | Grain vs Zn | Yogi et al. 2023 | 12 | 0.655 | 0.283 | 1.028 | *0.0006* |
|  | Grain vs Zn | Dheebakaran et al. 2019 | 30 | 0.642 | 0.42 | 0.864 | *0.0000* |
|  | Grain vs Zn | Saudy et al. 2021 | 19 | 0.628 | 0.331 | 0.925 | *0.0000* |
|  | Grain vs Zn | Zulfiqar et al. 2020 | 28 | 0.628 | 0.39 | 0.865 | *0.0000* |
|  | Grain vs Zn | Prakash et al. 2018 | 12 | 0.623 | 0.223 | 1.023 | *0.0023* |
|  | Grain vs Zn | Kandil et al. 2022 | 40 | 0.611 | 0.41 | 0.813 | *0.0000* |
|  | Grain vs Zn | Meena et al. 2018 | 16 | 0.554 | 0.177 | 0.931 | *0.0040* |
|  | Grain vs Zn | Shakeel et al. 2023 | 16 | 0.548 | 0.168 | 0.928 | *0.0048* |
|  | Grain vs Zn | Debnath et al. 2015 | 12 | 0.524 | 0.05 | 0.998 | *0.0299* |
|  | Grain vs Zn | Ramzani et al. 2016 | 12 | 0.504 | 0.016 | 0.991 | *0.0425* |
|  | Grain vs Zn | Yuan et al. 2017 | 18 | 0.501 | 0.122 | 0.88 | *0.0095* |
|  | Grain vs Zn | Haque et al. 2019 | 14 | 0.491 | 0.043 | 0.94 | *0.0315* |
|  | Grain vs Zn | Rashid et al. 2019 | 24 | 0.483 | 0.155 | 0.811 | *0.0040* |
|  | Grain vs Zn | Farooq et al. 2018 | 20 | 0.458 | 0.083 | 0.834 | *0.0166* |
|  | Grain vs Zn | Ram et al. 2016 | 36 | 0.436 | 0.159 | 0.712 | *0.0021* |
|  | Grain vs Zn | Tiwari et al. 1982 | 24 | 0.435 | 0.089 | 0.782 | *0.0138* |
|  | Grain vs Zn | Hafeez et al. 2013 | 25 | 0.432 | 0.092 | 0.772 | *0.0126* |
|  | Grain vs Zn | Sharma et al. 1982 | 20 | 0.403 | 0.005 | 0.801 | *0.0468* |
|  | Grain vs Zn | Mangueze et al. 2018 | 18 | 0.393 | -0.035 | 0.821 | *0.0713* |
|  | Grain vs Zn | Shivay et al. 2008b | 16 | 0.358 | -0.117 | 0.832 | *0.1397* |
|  | Grain vs Zn | Tyagi et al. 2018 | 60 | 0.321 | 0.088 | 0.554 | *0.0069* |
|  | Grain vs Zn | Shah et al. 2023 | 16 | 0.287 | -0.212 | 0.786 | *0.2623* |
|  | Grain vs Zn | Hazra et al. 2015 | 78 | 0.16 | -0.061 | 0.38 | *0.1564* |
|  | Grain vs Zn | Marr et al. 1999 | 29 | 0.108 | -0.272 | 0.488 | *0.5901* |
|  | Grain vs Zn | He et al. 2016 | 28 | 0.098 | -0.29 | 0.487 | *0.6320* |
|  | Grain vs Zn | Phattarakul et al. 2012 | 64 | 0.085 | -0.164 | 0.334 | *0.5140* |
|  | Grain vs Zn | Saha et al. 2015 | 84 | 0.084 | -0.133 | 0.3 | *0.4580* |
|  | Grain vs Zn | Ghasal et al. 2018 | 60 | 0.029 | -0.23 | 0.288 | *0.8371* |
|  | Grain vs Zn | Naeem et al. 2022 | 12 | -0.126 | -0.769 | 0.518 | *0.7152* |
|  | Grain vs Zn | Prom-u-thai et al. 2020 | 81 | -0.225 | -0.436 | -0.014 | *0.0361* |
|  | Grain vs Zn | Srivastava et al. 2009 | 12 | -0.233 | -0.851 | 0.385 | *0.4690* |
|  | Grain vs Zn | Guo et al. 2015 | 28 | -0.259 | -0.625 | 0.107 | *0.1660* |
|  | Grain vs Zn | Vaid et al. 2020 | 32 | -0.277 | -0.613 | 0.059 | *0.1063* |
|  | Grain vs Zn | Mtengeti et al. 2016 | 26 | -0.287 | -0.662 | 0.088 | *0.1338* |
|  | Grain vs Zn | Phuphong et al. 2018 | 12 | -0.293 | -0.89 | 0.304 | *0.3414* |
|  | Grain vs Zn | Bodeerath et al. 2024 | 78 | -0.383 | -0.576 | -0.19 | *0.0001* |
|  | Grain vs Zn | Islam et al. 2021 | 16 | -0.409 | -0.861 | 0.044 | *0.0766* |
|  | Grain vs Zn | Wei et al. 2012 | 15 | -0.464 | -0.908 | -0.02 | *0.0400* |
|  | Grain vs Zn | Jaksomsak et al. 2017 | 10 | -0.662 | -1.078 | -0.245 | *0.0019* |
|  | Grain vs Zn | Zhen et al. 2021 | 10 | -0.785 | -1.069 | -0.501 | *0.0000* |
|  | Grain vs Fe | Ramzani et al. 2016 | 12 | 0.956 | 0.899 | 1.012 | *0.0000* |
|  | Grain vs Fe | Muthumanickam et al. 2022 | 18 | 0.949 | 0.898 | 0.999 | *0.0000* |
|  | Grain vs Fe | Kumar et al. 2017b | 16 | 0.942 | 0.88 | 1.003 | *0.0000* |
|  | Grain vs Fe | Mehta et al. 2023 | 12 | 0.898 | 0.772 | 1.024 | *0.0000* |
|  | Grain vs Fe | Vijayakumar et al. 2023 | 24 | 0.86 | 0.749 | 0.971 | *0.0000* |
|  | Grain vs Fe | Baral et al. 2023 | 12 | 0.844 | 0.656 | 1.032 | *0.0000* |
|  | Grain vs Fe | Pooniya and Shivay 2013 | 24 | 0.841 | 0.716 | 0.966 | *0.0000* |
|  | Grain vs Fe | Rajput et al. 2024 | 10 | 0.837 | 0.615 | 1.059 | *0.0000* |
|  | Grain vs Fe | Zulfiqar et al. 2021 | 28 | 0.797 | 0.654 | 0.94 | *0.0000* |
|  | Grain vs Fe | Fan et al. 2012 | 24 | 0.793 | 0.634 | 0.952 | *0.0000* |
|  | Grain vs Fe | Saudy et al. 2021 | 19 | 0.726 | 0.494 | 0.958 | *0.0000* |
|  | Grain vs Fe | He et al. 2016 | 28 | 0.698 | 0.497 | 0.899 | *0.0000* |
|  | Grain vs Fe | Yuan et al. 2017 | 18 | 0.687 | 0.419 | 0.954 | *0.0000* |
|  | Grain vs Fe | Dass et al. 2017 | 11 | 0.686 | 0.318 | 1.053 | *0.0003* |
|  | Grain vs Fe | Fu et al. 2010 | 18 | 0.341 | -0.106 | 0.788 | *0.1351* |
|  | Grain vs Fe | Naeem et al. 2022 | 20 | 0.264 | -0.179 | 0.706 | *0.2452* |
|  | Grain vs Fe | Marr et al. 1999 | 29 | 0.246 | -0.115 | 0.607 | *0.1829* |
|  | Grain vs Fe | Kumar et al. 2020 | 14 | 0.231 | -0.328 | 0.79 | *0.4262* |
|  | Grain vs Fe | Mtengeti et al. 2016 | 26 | 0.136 | -0.266 | 0.537 | *0.5184* |
|  | Grain vs Fe | Prom-u-thai et al. 2020 | 81 | 0.126 | -0.093 | 0.344 | *0.2628* |
|  | Grain vs Fe | Butsai et al. 2022 | 24 | 0.093 | -0.331 | 0.517 | *0.6790* |
|  | Grain vs Fe | Saha et al. 2015 | 84 | -0.45 | -0.624 | -0.277 | *0.0000* |
|  | Grain vs Fe | Wang et al. 2023 | 12 | -0.519 | -0.996 | -0.042 | *0.0327* |
|  | Grain vs protein | Baral et al. 2023 | 12 | 0.983 | 0.96 | 1.005 | *0.0000* |
|  | Grain vs protein | Shivay et al. 2022 | 10 | 0.966 | 0.917 | 1.015 | *0.0000* |
|  | Grain vs protein | Ramzani et al. 2016 | 12 | 0.964 | 0.918 | 1.01 | *0.0000* |
|  | Grain vs protein | Singh et al. 2023 | 20 | 0.958 | 0.92 | 0.997 | *0.0000* |
|  | Grain vs protein | Kumar et al. 2017b | 16 | 0.952 | 0.9 | 1.003 | *0.0000* |
|  | Grain vs protein | Gangmei and George 2017 | 12 | 0.949 | 0.883 | 1.014 | *0.0000* |
|  | Grain vs protein | Pal and Sasmal 2020 | 16 | 0.938 | 0.873 | 1.003 | *0.0000* |
|  | Grain vs protein | Mehta et al. 2023 | 12 | 0.936 | 0.854 | 1.017 | *0.0000* |
|  | Grain vs protein | Ali et al. 2021 | 18 | 0.932 | 0.865 | 0.998 | *0.0000* |
|  | Grain vs protein | Bana et al. 2022 | 11 | 0.911 | 0.793 | 1.029 | *0.0000* |
|  | Grain vs protein | Kheyri et al. 2018 | 16 | 0.911 | 0.818 | 1.003 | *0.0000* |
|  | Grain vs protein | Pooniya and Shivay 2013 | 24 | 0.9 | 0.818 | 0.981 | *0.0000* |
|  | Grain vs protein | Prakash et al. 2018 | 12 | 0.885 | 0.744 | 1.027 | *0.0000* |
|  | Grain vs protein | Meena et al. 2018 | 16 | 0.831 | 0.662 | 0.999 | *0.0000* |
|  | Grain vs protein | Sultana et al. 2021 | 10 | 0.825 | 0.588 | 1.062 | *0.0000* |
|  | Grain vs protein | Kandil et al. 2022 | 40 | 0.817 | 0.71 | 0.924 | *0.0000* |
|  | Grain vs protein | Saudy et al. 2021 | 19 | 0.805 | 0.632 | 0.977 | *0.0000* |
|  | Grain vs protein | Elekhtyar et al. 2023 | 24 | 0.755 | 0.571 | 0.939 | *0.0000* |
|  | Grain vs protein | Hossain et al. 2008 | 54 | 0.754 | 0.635 | 0.872 | *0.0000* |
|  | Grain vs protein | Zulfiqar et al. 2021 | 14 | 0.732 | 0.458 | 1.006 | *0.0000* |
|  | Grain vs protein | Ali et al. 2014 | 50 | 0.611 | 0.432 | 0.79 | *0.0000* |
|  | Grain vs protein | Rajput et al. 2024 | 10 | 0.611 | 0.147 | 1.075 | *0.0099* |
|  | Grain vs protein | Haque et al. 2019 | 14 | 0.484 | 0.032 | 0.937 | *0.0357* |
|  | Grain vs protein | Marr et al. 1999 | 29 | 0.41 | 0.09 | 0.73 | *0.0120* |
|  | Grain vs protein | Mi et al. 2023 | 12 | 0.28 | -0.323 | 0.882 | *0.3690* |
|  | Grain vs protein | Yuan et al. 2017 | 18 | 0.176 | -0.315 | 0.666 | *0.4926* |
|  | Grain vs protein | Guo et al. 2015 | 28 | 0.026 | -0.366 | 0.417 | *0.9057* |
|  | Grain vs protein | Fahad et al. 2015 | 50 | -0.07 | -0.354 | 0.215 | *0.6439* |
|  | Grain vs protein | Mtengeti et al. 2016 | 26 | -0.334 | -0.697 | 0.029 | *0.0706* |
|  | Grain vs protein | Chandra et al. 2023 | 29 | -0.5 | -0.788 | -0.212 | *0.0007* |
|  | Grain vs protein | Wang et al. 2023 | 12 | -0.646 | -1.027 | -0.265 | *0.0009* |
|  | Grain vs protein | Jaksomsak et al. 2017 | 10 | -0.737 | -1.075 | -0.399 | *0.0000* |
|  | Grain vs phytate | Wang et al. 2023 | 12 | 0.209 | -0.416 | 0.834 | *0.5233* |
|  | Grain vs phytate | Saha et al. 2015 | 84 | 0.116 | -0.099 | 0.331 | *0.2934* |
|  | Grain vs phytate | Bodeerath et al. 2024 | 78 | -0.173 | -0.393 | 0.046 | *0.1220* |
|  | Grain vs phytate | Fu et al. 2010 | 18 | -0.252 | -0.726 | 0.221 | *0.3006* |
|  | Grain vs phytate | Tyagi et al. 2018 | 60 | -0.302 | -0.538 | -0.066 | *0.0120* |
|  | Grain vs phytate | Zulfiqar et al. 2021 | 28 | -0.482 | -0.783 | -0.181 | *0.0018* |
|  | Grain vs phytate | Vaid et al. 2020 | 32 | -0.81 | -0.935 | -0.684 | *0.0000* |
|  | Grain vs phytate | Ramzani et al. 2016 | 12 | -0.939 | -1.016 | -0.861 | *0.0000* |
|  | Zn vs Fe | Baral et al. 2023 | 12 | 0.988 | 0.973 | 1.003 | *0.0000* |
|  | Zn vs Fe | Kumar et al. 2017 | 14 | 0.974 | 0.945 | 1.004 | *0.0000* |
|  | Zn vs Fe | Naik & Das 2008 | 16 | 0.968 | 0.934 | 1.002 | *0.0000* |
|  | Zn vs Fe | Wei et al. 2012 | 15 | 0.872 | 0.737 | 1.008 | *0.0000* |
|  | Zn vs Fe | Vijayakumar et al. 2023 | 24 | 0.823 | 0.685 | 0.961 | *0.0000* |
|  | Zn vs Fe | Dass et al. 2017 | 11 | 0.82 | 0.594 | 1.047 | *0.0000* |
|  | Zn vs Fe | Marr et al. 1999 | 29 | 0.804 | 0.669 | 0.94 | *0.0000* |
|  | Zn vs Fe | Pooniya & Shivay 2015 | 16 | 0.8 | 0.604 | 0.996 | *0.0000* |
|  | Zn vs Fe | Muthumanickam et al. 2022 | 18 | 0.763 | 0.551 | 0.974 | *0.0000* |
|  | Zn vs Fe | Mehta et al. 2023 | 12 | 0.713 | 0.392 | 1.034 | *0.0000* |
|  | Zn vs Fe | Pooniya and Shivay 2013 | 24 | 0.654 | 0.409 | 0.899 | *0.0000* |
|  | Zn vs Fe | Yuan et al. 2017 | 18 | 0.627 | 0.319 | 0.934 | *0.0001* |
|  | Zn vs Fe | Pooniya & Shivay 2015 | 16 | 0.626 | 0.296 | 0.957 | *0.0002* |
|  | Zn vs Fe | Naeem et al. 2022 | 12 | 0.617 | 0.213 | 1.022 | *0.0028* |
|  | Zn vs Fe | Marques et al. 2021 | 60 | 0.582 | 0.411 | 0.754 | *0.0000* |
|  | Zn vs Fe | Ramzani et al. 2016 | 12 | 0.579 | 0.144 | 1.013 | *0.0091* |
|  | Zn vs Fe | Saudy et al. 2021 | 19 | 0.568 | 0.235 | 0.9 | *0.0009* |
|  | Zn vs Fe | He et al. 2016 | 28 | 0.479 | 0.176 | 0.781 | *0.0020* |
|  | Zn vs Fe | Reis et al. 2018 | 12 | 0.125 | -0.518 | 0.768 | *0.7157* |
|  | Zn vs Fe | Fu et al. 2010 | 18 | 0.099 | -0.402 | 0.6 | *0.7121* |
|  | Zn vs Fe | Saha et al. 2015 | 84 | -0.016 | -0.234 | 0.202 | *0.8948* |
|  | Zn vs Fe | Kumar et al. 2020 | 14 | -0.039 | -0.629 | 0.551 | *0.9055* |
|  | Zn vs Fe | Mtengeti et al. 2016 | 26 | -0.144 | -0.544 | 0.257 | *0.4914* |
|  | Zn vs Fe | Prom-u-thai et al. 2020 | 81 | -0.158 | -0.375 | 0.058 | *0.1518* |
|  | Zn vs Fe | Anusha et al. 2021 | 52 | -0.198 | -0.467 | 0.071 | *0.1487* |
|  | Zn vs Fe | Wang et al. 2023 | 12 | -0.553 | -1.007 | -0.1 | *0.0166* |
|  | Zn vs phytate | Wei et al. 2012 | 15 | 0.872 | 0.737 | 1.008 | *0.0000* |
|  | Zn vs phytate | Bodeerath et al. 2024 | 158 | 0.702 | 0.622 | 0.782 | *0.0000* |
|  | Zn vs phytate | Wang et al. 2023 | 24 | 0.496 | 0.173 | 0.818 | *0.0026* |
|  | Zn vs phytate | Jaksomsak et al. 2018 | 16 | 0.311 | -0.18 | 0.802 | *0.2165* |
|  | Zn vs phytate | Khampuang et al. 2020 | 40 | 0.239 | -0.065 | 0.542 | *0.1240* |
|  | Zn vs phytate | Vaid et al. 2020 | 32 | 0.179 | -0.173 | 0.532 | *0.3232* |
|  | Zn vs phytate | Fu et al. 2010 | 18 | -0.029 | -0.535 | 0.477 | *0.9174* |
|  | Zn vs phytate | Saha et al. 2015 | 84 | -0.446 | -0.62 | -0.271 | *0.0000* |
|  | Zn vs phytate | Tyagi et al. 2018 | 60 | -0.49 | -0.687 | -0.292 | *0.0000* |
|  | Zn vs phytate | Ramzani et al. 2016 | 12 | -0.582 | -1.014 | -0.15 | *0.0083* |
|  | Zn vs phytate | Bughio et al. 2021 | 16 | -0.81 | -0.997 | -0.624 | *0.0000* |
|  | Zn vs protein | Singh et al. 2023 | 20 | 0.995 | 0.99 | 1 | *0.0000* |
|  | Zn vs protein | Wei et al. 2012 | 15 | 0.907 | 0.807 | 1.007 | *0.0000* |
|  | Zn vs protein | Saudy et al. 2021 | 19 | 0.906 | 0.817 | 0.994 | *0.0000* |
|  | Zn vs protein | Baral et al. 2023 | 12 | 0.888 | 0.749 | 1.026 | *0.0000* |
|  | Zn vs protein | Kheyri et al. 2018 | 16 | 0.882 | 0.762 | 1.003 | *0.0000* |
|  | Zn vs protein | Bana et al. 2022 | 11 | 0.853 | 0.663 | 1.042 | *0.0000* |
|  | Zn vs protein | Meena et al. 2018 | 16 | 0.85 | 0.699 | 1.001 | *0.0000* |
|  | Zn vs protein | Pooniya & Shivay 2015 | 16 | 0.841 | 0.683 | 1 | *0.0000* |
|  | Zn vs protein | Ali et al. 2021 | 18 | 0.827 | 0.666 | 0.987 | *0.0000* |
|  | Zn vs protein | Soltani et al. 2016 | 12 | 0.825 | 0.615 | 1.034 | *0.0000* |
|  | Zn vs protein | Pooniya and Shivay 2013 | 24 | 0.811 | 0.665 | 0.957 | *0.0000* |
|  | Zn vs protein | Mehta et al. 2023 | 12 | 0.795 | 0.555 | 1.035 | *0.0000* |
|  | Zn vs protein | Jaksomsak et al. 2017 | 10 | 0.79 | 0.512 | 1.068 | *0.0000* |
|  | Zn vs protein | Shivay et al. 2022 | 10 | 0.772 | 0.472 | 1.071 | *0.0000* |
|  | Zn vs protein | Marr et al. 1999 | 29 | 0.769 | 0.612 | 0.926 | *0.0000* |
|  | Zn vs protein | Kumar et al. 2017 | 15 | 0.744 | 0.491 | 0.997 | *0.0000* |
|  | Zn vs protein | Guo et al. 2015 | 28 | 0.743 | 0.567 | 0.918 | *0.0000* |
|  | Zn vs protein | Elekhtyar et al. 2023 | 24 | 0.734 | 0.536 | 0.931 | *0.0000* |
|  | Zn vs protein | Yuan et al. 2017 | 18 | 0.727 | 0.489 | 0.966 | *0.0000* |
|  | Zn vs protein | Kandil et al. 2022 | 40 | 0.594 | 0.385 | 0.802 | *0.0000* |
|  | Zn vs protein | Mi et al. 2023 | 12 | 0.568 | 0.126 | 1.011 | *0.0118* |
|  | Zn vs protein | Mtengeti et al. 2016 | 26 | 0.549 | 0.263 | 0.834 | *0.0002* |
|  | Zn vs protein | Debnath et al. 2015 | 12 | 0.524 | 0.05 | 0.998 | *0.0299* |
|  | Zn vs protein | Ramzani et al. 2016 | 12 | 0.52 | 0.042 | 0.997 | *0.0325* |
|  | Zn vs protein | Hossain et al. 2008 | 54 | 0.482 | 0.271 | 0.693 | *0.0000* |
|  | Zn vs protein | Prakash et al. 2018 | 12 | 0.436 | -0.093 | 0.965 | *0.1058* |
|  | Zn vs protein | Anago et al. 2023 | 10 | 0.432 | -0.17 | 1.035 | *0.1604* |
|  | Zn vs protein | Fahad et al. 2015 | 50 | 0.319 | 0.062 | 0.576 | *0.0147* |
|  | Zn vs protein | Reis et al. 2018 | 12 | 0.29 | -0.308 | 0.889 | *0.3471* |
|  | Zn vs protein | Haque et al. 2019 | 14 | 0.197 | -0.371 | 0.765 | *0.5068* |
|  | Zn vs protein | Saleque et al. 2001 | 25 | 0.054 | -0.362 | 0.471 | *0.8103* |
|  | Zn vs protein | Chandra et al. 2023 | 29 | -0.218 | -0.584 | 0.148 | *0.2465* |
|  | Zn vs protein | Wang et al. 2023 | 12 | -0.481 | -0.983 | 0.022 | *0.0605* |
|  | Fe vs protein | Ramzani et al. 2016 | 12 | 0.954 | 0.895 | 1.013 | *0.0000* |
|  | Fe vs protein | Wei et al. 2012 | 15 | 0.934 | 0.861 | 1.006 | *0.0000* |
|  | Fe vs protein | Baral et al. 2023 | 12 | 0.913 | 0.804 | 1.022 | *0.0000* |
|  | Fe vs protein | Kumar et al. 2017b | 16 | 0.898 | 0.793 | 1.003 | *0.0000* |
|  | Fe vs protein | Mehta et al. 2023 | 12 | 0.866 | 0.702 | 1.029 | *0.0000* |
|  | Fe vs protein | Zulfiqar et al. 2021 | 14 | 0.837 | 0.66 | 1.014 | *0.0000* |
|  | Fe vs protein | Pooniya and Shivay 2013 | 24 | 0.811 | 0.665 | 0.957 | *0.0000* |
|  | Fe vs protein | Kumar et al. 2017 | 14 | 0.81 | 0.606 | 1.013 | *0.0000* |
|  | Fe vs protein | Saudy et al. 2021 | 19 | 0.776 | 0.58 | 0.971 | *0.0000* |
|  | Fe vs protein | Marr et al. 1999 | 29 | 0.568 | 0.307 | 0.828 | *0.0000* |
|  | Fe vs protein | Yuan et al. 2017 | 18 | 0.521 | 0.152 | 0.889 | *0.0057* |
|  | Fe vs protein | Gandebe et al. 2017a | 80 | 0.49 | 0.32 | 0.66 | *0.0000* |
|  | Fe vs protein | Rajput et al. 2024 | 10 | 0.326 | -0.336 | 0.988 | *0.3394* |
|  | Fe vs protein | Wang et al. 2023 | 12 | 0.279 | -0.323 | 0.882 | *0.3697* |
|  | Fe vs protein | Reis et al. 2018 | 12 | -0.151 | -0.789 | 0.487 | *0.6559* |
|  | Fe vs protein | Mtengeti et al. 2016 | 26 | -0.315 | -0.683 | 0.054 | *0.0939* |
|  | Fe vs phytate | Wei et al. 2012 | 15 | 0.862 | 0.716 | 1.007 | *0.0000* |
|  | Fe vs phytate | Saha et al. 2015 | 84 | 0.201 | -0.008 | 0.41 | *0.0594* |
|  | Fe vs phytate | Wang et al. 2023 | 12 | 0.023 | -0.63 | 0.676 | *0.9496* |
|  | Fe vs phytate | Fu et al. 2010 | 18 | -0.166 | -0.658 | 0.326 | *0.5195* |
|  | Fe vs phytate | Zulfiqar et al. 2021 | 28 | -0.809 | -0.944 | -0.674 | *0.0000* |
|  | Fe vs phytate | Ramzani et al. 2016 | 12 | -0.987 | -1.004 | -0.97 | *0.0000* |
|  | Protein vs phytate | Wei et al. 2012 | 15 | 0.739 | 0.483 | 0.996 | *0.0000* |
|  | Protein vs phytate | Wang et al. 2023 | 12 | -0.648 | -1.027 | -0.268 | *0.0009* |
|  | Protein vs phytate | Ramzani et al. 2016 | 12 | -0.94 | -1.016 | -0.864 | *0.0000* |
|  | Protein vs phytate | Zulfiqar et al. 2021 | 14 | -0.956 | -1.007 | -0.904 | *0.0000* |

## Table S4. G×E interactions and heritability

Table S4a. Estimates of the explained variation (in %) attributed to the genotype, environment and the G×E interaction effects on grain yield, grain Zn, Fe and protein concentrations

| Variable |  |  | Explained | variation (in %) |  |
| --- | --- | --- | --- | --- | --- |
|  | Reference | Country [G, E]† | Genotype | Environment | G×E |
| Grain yield | Naik et al. (2020) | India [68; 14] | NA** | NA** | NA** |
|  | Behera et al. (2023) | India [21; 5] | 10.5** | 72.1** | 9.2** |
|  | Das et al. (2010) | India [11; 12] | 1.7*** | 30.5** | 13.1** |
|  | Nassir and Ariyo (2011) | Nigeria [11; 4] | 28.5** | 47.6** | 24.0** |
|  | Premi et al. (2023) | India [11; 3] | 4.2* | 1.2* | 7.1* |
|  | Susanto et al. (2015) | Indonesia [21; 5] | 10.3** | 67.7** | 8.8*** |
|  | Zhang et al. (2019) | China [8, 9] | 33.8** | 25.7** | 37.7** |
|  |  |  |  |  |  |
| Grain Zn | Naik et al. (2020) | India [68; 14] | ** | NS | ** |
|  | Ajmera et al. (2017) | India [37; 3] | 19.8** | 59.7** | 13.1** |
|  | Behera et al. (2023) | India [21; 5] | 27.9** | 53.0** | 11.2** |
|  | Pandian et al. (2011) | India [17; 3] | 21.9** | 0.4** | 60.8** |
|  | Premi et al. (2023) | India [11; 3] | 58.3** | 3.3* | 3.6* |
|  |  |  |  |  |  |
| Grain Fe | Naik et al. (2020) | India [68; 14] | ** | NS | ** |
|  | Ajmera et al. (2017) | India [37; 3] | 52.9** | 0.61** | 36.8** |
|  | Pandian et al. (2011) | India [17; 3] | 26.3** | 10.6** | 54.5** |
|  | Premi et al. (2023) | India [11; 3] | 4.5* | 32.2** | 0.14* |

† G and E in brackets represent the number of genotypes and environments (locations or location x year in some studies); ** represents significant effect (P < 0.05) of genotype, environment or the GxE interaction

NA = estimate not available, but significance of results were reported; NS = not significant

Table S4b. Broad-sense heritability estimates (H2) of grain yield, gran Zn, Fe and protein concentrations of in rice gleaned from the literature

| Variable | Reference | Country [G, E]† | Heritability (H2) |
| --- | --- | --- | --- |
| Grain yield | Maurya et al. (2022) | India [19, 2] | 0.129 |
|  | Rohaeni et al. (2023) | Indonesia [35, 2] | 0.130 |
|  | Naik et al. (2020) | India [68 , 12] | 0.220 |
|  | Naik et al. (2020) | India [68 , 12] | 0.250 |
|  | Ullah et al. (2023) | Bangladesh [5, 1] | 0.267 |
|  | Naik et al. (2020) | India [68 , 12] | 0.590 |
|  | Naik et al. (2020) | India [68 , 12] | 0.630 |
|  | Calayugan (2020) | United States [2, 3] | 0.660 |
|  | Naik et al. (2020) | India [68 , 12] | 0.720 |
|  | Naik et al. (2020) | India [68 , 12] | 0.770 |
|  | Naik et al. (2020) | India [68 , 12] | 0.770 |
|  | Calayugan (2020) | United States [2, 3] | 0.780 |
|  | Gande et al. (2013) | India [8, 2] | 0.786 |
|  | Gande et al. 2013 | India [160, 1] | 0.786 |
|  | Sala et al. (2015) | India [X, 2] | 0.799 |
|  | Naik et al. (2020) | India [68 , 12] | 0.800 |
|  | Naik et al. (2020) | India [68 , 12] | 0.800 |
|  | Calayugan (2020) | United States [2, 3] | 0.830 |
|  | Sala et al. (2015) | India [X, 2] | 0.865 |
|  | Bekele et al. 2013 | India [6, 1] | 0.884 |
|  | Bekele et al. (2013) | India [15, 2] | 0.884 |
|  | Naik et al. (2020) | India [68 , 12] | 0.890 |
|  | Gande et al. (2013) | India [8, 2] | 0.891 |
|  | Gande et al. 2013 | India [160, 1] | 0.891 |
|  | Sala et al. (2015) | India [X, 2] | 0.895 |
|  | Naik et al. (2020) | India [68 , 12] | 0.900 |
|  | Bekele et al. 2013 | India [6, 1] | 0.910 |
|  | Bekele et al. (2013) | India [15, 2] | 0.910 |
|  | Sala et al. (2015) | India [X, 2] | 0.912 |
|  | Naik et al. (2020) | India [68 , 12] | 0.920 |
|  | Naik et al. (2020) | India [68 , 12] | 0.940 |
|  | Naik et al. (2020) | India [68 , 12] | 0.950 |
| Grain Zn concentration | Maurya et al. (2022) | India [19, 2] | 0.077 |
|  | Garcia-Oliveira et al. 2009 | China [85, 1] | 0.406 |
|  | Garcia et al. (2009) | China [X, 2] | 0.406 |
|  | Pinson et al. (2015) | United States [10, 2] | 0.470 |
|  | Pinson et al. (2015) | United States [10, 2] | 0.500 |
|  | Naik et al. (2020) | India [68 , 12] | 0.510 |
|  | Naik et al. (2020) | India [68 , 12] | 0.560 |
|  | Norton et al. 2010 | China [?, 1] | 0.679 |
|  | Norton et al. (2009) | China [3, 1] | 0.679 |
|  | Thongbam et al. 2012 | India [18, 1] | 0.706 |
|  | Calayugan (2020) | United States [2, 3] | 0.710 |
|  | Gande et al. 2013 | India [160, 1] | 0.750 |
|  | Calayugan (2020) | United States [2, 3] | 0.750 |
|  | Naik et al. (2020) | India [68 , 12] | 0.750 |
|  | Gande et al. (2013) | India [8, 2] | 0.750 |
|  | Susanto 2008 | Indonesia [, ] | 0.764 |
|  | Calayugan (2020) | United States [2, 3] | 0.780 |
|  | Bekele et al. 2013 | India [6, 1] | 0.783 |
|  | Bekele et al. (2013) | India [15, 2] | 0.783 |
|  | Naik et al. (2020) | India [68 , 12] | 0.790 |
|  | Bekele et al. (2013) | India [15, 2] | 0.806 |
|  | Rohaeni et al. (2023) | Indonesia [35, 2] | 0.830 |
|  | Gande et al. 2013 | India [160, 1] | 0.857 |
|  | Gande et al. (2013) | India [8, 2] | 0.857 |
|  | Babu et al. 2012 | India | 0.858 |
|  | Bekele et al. 2013 | India [6, 1] | 0.859 |
|  | Naik et al. (2020) | India [68 , 12] | 0.870 |
|  | Naik et al. (2020) | India [68 , 12] | 0.870 |
|  | Sala et al. (2013) | India [4-8] | 0.870 |
|  | Sala et al. (2015) | India [X, 2] | 0.870 |
|  | Naik et al. (2020) | India [68 , 12] | 0.880 |
|  | Sala et al. (2013) | India [4-8] | 0.895 |
|  | Naik et al. (2020) | India [68 , 12] | 0.900 |
|  | Naik et al. (2020) | India [68 , 12] | 0.900 |
|  | Naik et al. (2020) | India [68 , 12] | 0.910 |
|  | Naik et al. (2020) | India [68 , 12] | 0.910 |
|  | Sala et al. (2013) | India [4-8] | 0.926 |
|  | Naik et al. (2020) | India [68 , 12] | 0.940 |
|  | Sala et al. (2013) | India [4-8] | 0.941 |
|  | Sala et al. (2013) | India [4-8] | 0.942 |
|  | Sala et al. (2015) | India [X, 2] | 0.942 |
|  | Sala et al. (2013) | India [4-8] | 0.958 |
|  | Sala et al. (2015) | India [X, 2] | 0.958 |
|  | Naik et al. (2020) | India [68 , 12] | 0.960 |
|  | Samak et al. 2011 | India [1, 1] | 0.961 |
|  | Zhang et al. 2004 |  | 0.969 |
|  | Sala et al. (2013) | India [4-8] | 0.969 |
|  | Sala et al. (2015) | India [X, 2] | 0.969 |
|  | Sala et al. (2013) | India [4-8] | 0.980 |
|  | Ullah et al. (2023) | Bangaladesh [5, 1] | 0.984 |
|  | Naik et al. (2020) | India [68 , 12] | 0.990 |
|  | Samak et al. 2011 | India [1, 1] | 0.995 |
| Grain Fe concentration | Maurya et al. (2022) | India [19, 2] | 0.068 |
|  | Norton et al. (2009) | China [3, 1] | 0.091 |
|  | Norton et al. 2010 | China [?, 1] | 0.091 |
|  | Naik et al. (2020) | India [68 , 12 | 0.100 |
|  | Calayugan (2020) | United States [2, 3] | 0.220 |
|  | Calayugan (2020) | United States [2, 3] | 0.350 |
|  | Naik et al. (2020) | India [68 , 12 | 0.380 |
|  | Naik et al. (2020) | India [68 , 12 | 0.400 |
|  | Naik et al. (2020) | India [68 , 12 | 0.400 |
|  | Naik et al. (2020) | India [68 , 12 | 0.420 |
|  | Pinson et al. (2015) | United States [10, 2] | 0.470 |
|  | Calayugan (2020) | United States [2, 3] | 0.490 |
|  | Naik et al. (2020) | India [68 , 12 | 0.500 |
|  | Naik et al. (2020) | India [68 , 12 | 0.500 |
|  | Naik et al. (2020) | India [68 , 12 | 0.590 |
|  | Naik et al. (2020) | India [68 , 12 | 0.600 |
|  | Thongbam et al. (2012) | India [18, 1] | 0.626 |
|  | Naik et al. (2020) | India [68 , 12 | 0.660 |
|  | Naik et al. (2020) | India [68 , 12 | 0.670 |
|  | Naik et al. (2020) | India [68 , 12 | 0.700 |
|  | Garcia et al. (2009) | China [X, 2] | 0.728 |
|  | Garcia-Oliveira et al. 2009 | China [85, 1] | 0.728 |
|  | Pinson et al. (2015) | United States [10, 2] | 0.730 |
|  | Naik et al. (2020) | India [68 , 12 | 0.880 |
|  | Naik et al. (2020) | India [68 , 12 | 0.900 |
|  | Rohaeni et al. (2023) | Indonesia [35, 2] | 0.910 |
|  | Ullah et al. (2023) | Bangaladesh [5, 1] | 0.921 |
|  | Sala et al. (2013) | India [4, 2] | 0.934 |
|  | Sala et al. (2015) | India [4, 2] | 0.934 |
|  | Samak et al. 2011 | India [1, 1] | 0.950 |
|  | Sala et al. (2013) | India [4, 2] | 0.952 |
|  | Samak et al. 2011 | India [1, 1] | 0.953 |
|  | Sala et al. (2013) | India [4, 2] | 0.964 |
|  | Sala et al. (2013) | India [4, 2] | 0.973 |
|  | Sala et al. (2015) | India [4, 2] | 0.973 |
|  | Sala et al. (2013) | India [4, 2] | 0.977 |
|  | Sala et al. (2013) | India [4, 2] | 0.995 |
|  | Sala et al. (2015) | India [4, 2] | 0.995 |
|  | Sala et al. (2013) | India [4, 2] | 0.996 |
|  | Sala et al. (2013) | India [4, 2] | 0.999 |
|  | Sala et al. (2015) | India [4, 2] | 0.999 |
| Grain protein concentration | Samak et al. 2011 | India [1, 1] | 0.433 |
|  | Samak et al. 2011 | India [1, 1] | 0.478 |
|  | Thongbam et al. (2012) | India [18, 1] | 0.810 |

## Table S5. Differences between ecotypes

Table S5. Differences between admixtures, aromatic, AUS, Indica, and Japonica rice cultivars in harvest index, grain yield, grain Zn, Fe, and protein concentrations of brown rice. The two-tailed *P* value based on a Kruskal–Wallis test of equality of medians is also provided.

|  |  | Median | Lower CI | Upper CI | *P* value for equality of medians |
| --- | --- | --- | --- | --- | --- |
| Harvest index | Admixtures (106) | 43.6 | 42.7 | 44.1 | *<0.001* |
|  | Aromatic (501) | 32.4 | 32.0 | 33.4 |  |
|  | AUS (45) | 46.9 | 43.4 | 50.8 |  |
|  | Indica (930) | 43.2 | 42.4 | 44.0 |  |
|  | Japonica (35) | 42.6 | 34.1 | 49.1 |  |
|  | Unknown (905) | 42.6 | 42.2 | 43.3 |  |
|  |  |  |  |  |  |
| Grain yield (t ha-1) | Admixtures (111) | 6.1 | 5.2 | 8.0 | *<0.001* |
|  | Aromatic (648) | 4.3 | 4.1 | 4.4 |  |
|  | AUS (59) | 3.2 | 2.8 | 3.6 |  |
|  | Indica (1185) | 3.3 | 3.1 | 3.4 |  |
|  | Japonica (155) | 8.3 | 7.7 | 8.8 |  |
|  | Unknown (2150) | 4.5 | 4.4 | 4.6 |  |
|  |  |  |  |  |  |
| Grain Zn (mg kg-1) | Admixtures (378) | 27.2 | 26.5 | 27.7 | *<0.001* |
|  | Aromatic (757) | 25.0 | 24.2 | 25.5 |  |
|  | AUS (348) | 27.7 | 27.0 | 28.4 |  |
|  | Indica (1504) | 23.9 | 23.6 | 24.3 |  |
|  | Japonica (1676) | 27.5 | 27.3 | 27.7 |  |
|  | Unknown (3583) | 24.2 | 24.0 | 24.6 |  |
|  |  |  |  |  |  |
| Grain Fe (mg kg-1) | Admixtures (349) | 11.6 | 11.3 | 11.8 | *<0.001* |
|  | Aromatic (357) | 12.2 | 11.9 | 12.6 |  |
|  | AUS (335) | 10.9 | 10.7 | 11.1 |  |
|  | Indica (1373) | 10.7 | 10.6 | 10.8 |  |
|  | Japonica (596) | 12.4 | 12.3 | 12.6 |  |
|  | Unknown (1814) | 12.1 | 12.0 | 12.3 |  |
|  |  |  |  |  |  |
| Grain protein (%) | Admixtures (92) | 8.5 | 8.3 | 8.8 | *<0.001* |
|  | Aromatic (273) | 7.9 | 7.7 | 8.3 |  |
|  | AUS (55) | 8.2 | 8.1 | 8.5 |  |
|  | Indica (189) | 8.0 | 7.9 | 8.3 |  |
|  | Japonica (266) | 8.4 | 8.2 | 8.6 |  |
|  | Unknown (510) | 7.7 | 7.6 | 7.9 |  |

Two or more medians are deemed significantly different if their 95% confidence intervals do not overlap and the Kruskal-Wallis test of equality of medians produces P <0.05

## Table S6. Treatment groups used in meta-analysis

Table S6. Treatment groups, the number of studies, and total number of observations available for meta-analysis

| Treatment code | Description | No. studies | No. observations |
| --- | --- | --- | --- |
| Znsoil | Soil application of zinc | 93 | 1013 |
| Znfoliar | Foliar application of zinc | 67 | 661 |
| Znsoil+Znfoliar | Soil application of zinc + foliar application of zinc | 23 | 358 |
| Manures | Application of livestock manure or green manure | 18 | 81 |
| LowN | N application rates lower than the recommended rate | 16 | 43 |
| Znseed | Seed treatment with zinc | 13 | 62 |
| Fesoil | Soil application of iron | 12 | 67 |
| Fefoliar | Foliar application of iron | 11 | 39 |
| HighN | N application rates higher than the recommended | 9 | 51 |
| Znfoliar+Fefoliar | Foliar application of zinc + Foliar application of iron | 8 | 50 |
| Sefoliar | Foliar application of selenium | 7 | 92 |
| Znsoil+Fesoil | Soil application of zinc + soil application of iron | 6 | 23 |
| GPR/ZnSolB | Growth promoting rhizobacteria/Zinc solubilizing bacteria | 5 | 113 |
| WithoutP | Without P fertilizer application | 4 | 645 |
| Feseed | Seed treatment with iron | 3 | 11 |
| Fesoil+Fefoliar | Soil + foliar application of iron | 3 | 14 |
| Znsoil+Fefoliar | Soil application of zinc + foliar application of iron | 2 | 21 |
| Noinput | No external input applied | 31 | 136 |
| Other* | Application or omission of other macronutrients (e.g., P, K, S, etc.) and micronutrients (e.g., B, I, Mn, Se, etc.) | 39 | 187 |

* Treatments reported in fewer than 3 studies were placed under the rubric “Other”
